# Temperature alters gene expression in mosquitoes during arbovirus infection

BMC Randika Wimalasiri-Yapa<sup>1,2</sup>, Roberto A. Barrero<sup>3</sup>, Liesel Stassen<sup>1</sup>, Louise M. Hafner<sup>1</sup>,  
Elizabeth A. McGraw<sup>4</sup>, Alyssa T. Pyke<sup>5</sup>, Cassie C. Jansen<sup>6</sup>, Andreas Suhrbier<sup>7</sup>, Laith Yakob<sup>8</sup>,  
Wenbiao Hu<sup>9</sup>, Gregor J. Devine<sup>10</sup>, Francesca D. Frentiu<sup>1\*</sup>

<sup>1</sup>Institute of Health and Biomedical Innovation, and School of Biomedical Sciences, Faculty of Health, Queensland University of Technology, Brisbane, QLD, Australia

<sup>2</sup>Department of Medical Laboratory Sciences, Faculty of Health Science, Open University of Sri Lanka, Nugegoda, Colombo, Sri Lanka

<sup>3</sup>eResearch Office, Division of Research & Innovation, Queensland University of Technology, Brisbane, QLD, Australia

<sup>4</sup>Center for Infectious Disease Dynamics, Department of Entomology, The Pennsylvania State University, University Park, PA 16801 USA

<sup>5</sup>Public Health Virology Laboratory, Forensic and Scientific Services, Coopers Plains, Queensland, Australia

<sup>6</sup>Communicable Diseases Branch, Department of Health, Queensland Government, Herston, QLD, Australia

<sup>7</sup>Inflammation Biology, QIMR Berghofer Medical Research Institute, Brisbane, QLD 4006, Australia

<sup>8</sup>London School of Hygiene and Tropical Medicine, London, United Kingdom,

<sup>9</sup>School of Public Health and Social Work, Queensland University of Technology, Brisbane, QLD, Australia

<sup>10</sup>Mosquito Control Laboratory, QIMR Berghofer Medical Research Institute, Brisbane, QLD, Australia

\* Corresponding author: Francesca D. Frentiu ([francesca.frentiu@qut.edu.au](mailto:francesca.frentiu@qut.edu.au))

**Running head:** Temperature alters mosquito immune gene expression

**Keywords:** *Aedes aegypti*, transcriptome, temperature, chikungunya virus, immune genes, immunity, gene ontology, pathway enrichment

## 1 ABSTRACT

2 Arthropod-borne viruses (arboviruses) such as dengue, Zika and chikungunya constitute a  
3 significant proportion of the global disease burden. The principal vector of these pathogens  
4 is the mosquito *Aedes (Ae.) aegypti*, and its ability to transmit virus to a human host is  
5 influenced by environmental factors such as temperature. However, exactly how ambient  
6 temperature influences virus replication within mosquitoes remains poorly elucidated,  
7 particularly at the molecular level. Here, we use chikungunya virus (CHIKV) as a model to  
8 understand how the host mosquito transcriptome responds to arbovirus infection under  
9 different ambient temperatures. We exposed CHIKV-infected mosquitoes to 18 °C, 28 °C and  
10 32 °C, and found higher temperature correlated with higher virus replication levels,  
11 particularly at early time points post-infection. Lower ambient temperatures resulted in  
12 reduced virus replication levels. Using RNAseq, we found that temperature significantly  
13 altered gene expression levels in mosquitoes, particularly components of the immune  
14 response. The highest number of significantly differentially expressed genes in response to  
15 CHIKV was observed at 28 °C, with a markedly more muted effect observed at either lower  
16 (18 °C) or higher (32 °C) temperatures. At the higher temperature, the expression of many  
17 classical immune genes, including *Dicer-2* in the RNAi pathway, was not substantially  
18 altered in response to CHIKV. Upregulation of Toll, IMD and JAK-STAT pathways was  
19 only observed at 28 °C. Time post infection also led to substantially different gene expression  
20 profiles, and this effect varied depending upon the which temperature mosquitoes were  
21 exposed to. Taken together, our data indicate temperature significantly modulates mosquito  
22 gene expression in response to infection, potentially leading to impairment of immune  
23 defences at higher ambient temperatures.

## 24 INTRODUCTION

25 Arthropod-borne diseases constitute a significant proportion of the global infectious disease  
26 burden, with yearly estimates of ~ 1 billion infections and 1 million deaths [1]. Dengue viruses  
27 (DENVs 1-4), Zika virus (ZIKV) and chikungunya (CHIKV) are some of the most common  
28 pathogens causing epidemics of arthropod-borne virus (arboviruses) disease in recent decades  
29 [2]. These viruses are principally vectored to humans by the mosquitoes *Aedes (Ae.) aegypti*  
30 and *Ae. albopictus* [3]. Because mosquitoes are poikilothermic, almost all their biological  
31 activities are influenced by ambient environmental conditions [4], such as temperature.  
32 Understanding how mosquitoes respond to changes in this key parameter, over the short and  
33 long term, are necessary to improve predictions of arbovirus futures.

34 Recent projections have suggested that climate change may increase the risk of arbovirus  
35 transmission, as higher average temperatures are projected to expand the geographic  
36 distributions and lengthen active seasons of arthropod vectors [5-9] Temperature is also known  
37 to alter the ability of *Aedes* spp. mosquitoes to transmit viruses, with higher temperatures  
38 following infection leading to increased viral replication and earlier transmission potential [10,  
39 11]. Conversely, lower ambient temperatures lead to decreased viral replication and delayed  
40 transmission by mosquitoes [12, 13]. Exactly how ambient temperature influences the  
41 physiological, molecular and genetic interactions between virus and mosquito during infection  
42 remains poorly elucidated.

43 Mosquitoes possess physical and physiological barriers against pathogen infection. Insect  
44 protection relies on the humoral and cellular immune responses, which comprise the innate  
45 immune system [14]. Mosquito immune response can be divided into four components:  
46 pathogen recognition, activation of immune signalling, immune effector mechanisms [15] and  
47 immune modulation by the regulation of mosquito homeostasis. Apart from known (termed  
48 ‘classical’) immune genes within these four categories, recent studies have indicated the

49 involvement of additional gene families during arbovirus infection in *Ae. aegypti*. Additional  
50 genes included cytoskeleton and cellular trafficking, heat shock response, cytochrome P450,  
51 cell proliferation, chitin and small RNAs [15]. Long noncoding RNAs (lncRNAs) are also  
52 involved in *Ae. aegypti*-virus interactions, particularly in DENV and ZIKV infections [16, 17].  
53 However, it is not well understood how gene expression is modulated in mosquitoes exposed  
54 to different ambient temperatures. Even less well understood is how the mosquito immune  
55 response may change in response to temperature during prolonged virus infection, and how  
56 this may impact on the insect's ability to vector pathogens.

57 CHIKV is an emerging arbovirus, responsible for several recent large outbreaks globally with  
58 an estimated 10 million cases [18-20]. Rarely fatal, CHIKV typically causes an acute febrile  
59 syndrome and severe, debilitating rheumatic disorders in humans that may persist for months  
60 [21]. The main vector of CHIKV is *Ae. aegypti* [22], with *Ae. albopictus* also playing an  
61 important role in more recent outbreaks [23]. CHIKV cases were reported from Africa, Asia,  
62 Europe, islands of Indian and Pacific oceans until 2013, when the first autochthonous cases  
63 were reported in the Americas on islands in the Caribbean. By the end of 2017, more than 2.6  
64 million suspected cases of CHIKV had been reported from the Caribbean and the Americas  
65 [24]. Since then, the virus has continued to circulate and cause sporadic disease and periodic  
66 outbreaks with very high attack rates in many areas of the world [24]. CHIKV is a single-  
67 stranded, positive sense RNA virus from the *Togaviridae* family, genus *Alphavirus*. To date,  
68 the interactions between emerging alphaviruses, such as CHIKV, and their mosquito hosts  
69 under different temperatures have been less characterised than those of flaviviruses, namely  
70 DENV and ZIKV. In addition, although mosquitoes remain infected with arboviruses for life  
71 [25], the immune responses underlying long term persistence of these pathogens is not well  
72 understood.

73 Here, we report how exposure to 3 ambient temperature regimes (18 °C, 28 °C and 32 °C) alter  
74 gene expression in mosquitoes infected with CHIKV, sampled at two time points post infection.  
75 We found that temperature alters the transcriptome, with the highest number of upregulated  
76 genes observed at 28 °C, while lower temperatures were associated with more downregulated  
77 genes. Importantly, we observed the absence of *Dicer-2* and low levels of immune gene  
78 expression at 32 °C, suggesting heat may impair mosquito immunity and the ability to mount  
79 an adequate RNAi response. We also show that mosquito gene expression is not constant over  
80 the course of arbovirus infection, with distinct gene expression profiles observed for each  
81 temperature and time point sampled.

82

## 83 **RESULTS**

### 84 **CHIKV replication varies with ambient temperature and age of mosquitoes**

85 To determine how ambient temperature modulates replication of CHIKV, and how this may  
86 vary over the course of infection, *Ae. aegypti* mosquitoes were orally infected with a CHIKV  
87 strain from the Asian genotype (GenBank accession MF773560) and held at 18, 28 or 32 °C  
88 for either 3- or 7-days post infection (dpi) (n=18-20 mosquitoes per combination of T °C and  
89 dpi). Using qRT-PCR (as per [26]), we found that at 3 dpi, the number of virus genome copies  
90 in mosquito bodies (including heads but without wings and legs) held at 32 °C was significantly  
91 higher than that from mosquitoes held at the other temperatures (**Fig. 1 A**). By contrast, at 7  
92 dpi, the highest amount of virus was present in mosquitoes held at 28 °C, with a decline in  
93 CHIKV copy number observed at 32 °C (**Fig. 1 B**). Next, we performed RNAseq on a subset  
94 of six mosquitoes for each temperature and timepoint (n=72 total). Of the 2,661,279,246  
95 Illumina paired end reads generated in this study, 10,155,660 (0.38%) of reads mapped onto  
96 the CHIKV genome (MF773560 strain). CHIKV reads obtained from the RNAseq data were

97 largely congruent with qRT-PCR results (**Fig. 1 C**), with the highest read count (normalized  
98 reads per million) observed in mosquitoes held at 32 °C and sampled at 3 dpi. Normalized viral  
99 read counts were significantly correlated with copy number from qRT-PCR ( $r^2=0.8916$ ,  
100  $p<0.001$ ). Two samples, from a total of 72 submitted for RNAseq, were removed from  
101 downstream analyses of differential gene expression. These samples were identified as outliers  
102 in the correlation between virus titer and normalised read counts (**Fig. 1 C**).

103

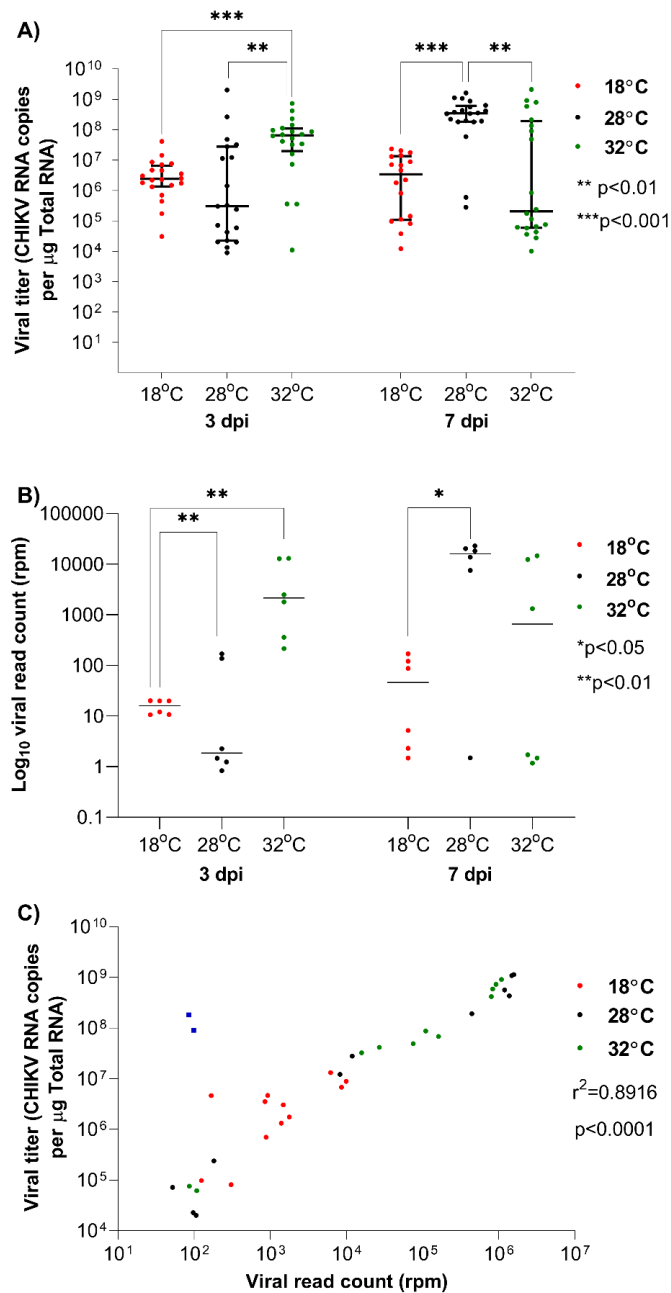

104

105 **Fig. 1. Effect of temperature and day post infection (dpi) on CHIKV replication in *Ae. aegypti***

106 **mosquitoes. A)** CHIKV RNA copy numbers detected using qRT-PCR in whole mosquito bodies, 18

107 °C (n=20 and n=18), 28 °C (n=19 and n=20) and 32 °C (n=20 in each timepoint), sampled at 3 and 7

108 dpi. Statistical significance was assessed using Mann Whitney tests. **B)** CHIKV read counts obtained

109 from RNAseq of *Ae. aegypti* samples (6 mosquito bodies per each temperature/dpi combination).

110 Log<sub>10</sub> normalised reads per million (rpm) counts shown. **C)** Pearson correlation between body

111 CHIKV titer from qRT-PCR and virus read counts, across all temperatures and both time points. Each

112 point on the plots represents an individual mosquito. The dark blue squares in C) indicate two outlier

113 samples that were removed from downstream analyses of the mosquito transcriptome.



## 114 Temperature alters differential gene expression during CHIKV infection

115 A total of 2,511,065,774 (94.36%) reads from 70 samples were mapped to the reference  
116 genome of *Ae. aegypti*, version AaegL5.2 (**Supplementary Table 1**). For each temperature  
117 and time regime, differentially expressed genes (DEGs) in response to CHIKV infection were  
118 identified using DESeq2 by comparison to uninfected control mosquitoes. DEGs were  
119 considered statistically significant if the adjusted p-value <0.05 and absolute fold change (FC)  
120 >  $\pm 1.5$ . At 3 dpi, we detected 715 DEGs across all temperature regimes. We observed a large  
121 number of upregulated genes (n=374) in mosquitoes held at 28 °C, but a dramatically lower  
122 number at 32 °C, with classical immune gene expression generally following the same pattern  
123 (**Fig 2 A**; **Supplementary Table 2** for a list of genes). At 7 dpi, we found a similar number of  
124 DEGs (n=726) in response to CHIKV infection to that observed at 3 dpi (**Fig 2 B**). The highest  
125 number of DEGs was observed in mosquitoes held at 28 °C, including classical immune  
126 response genes, a pattern similar to 3 dpi (**Supplementary Table 3**). By contrast, at 7 dpi we  
127 observed a substantial decrease in DEGs at 18 °C but a marked increase in upregulated DEGs  
128 at 32 °C.

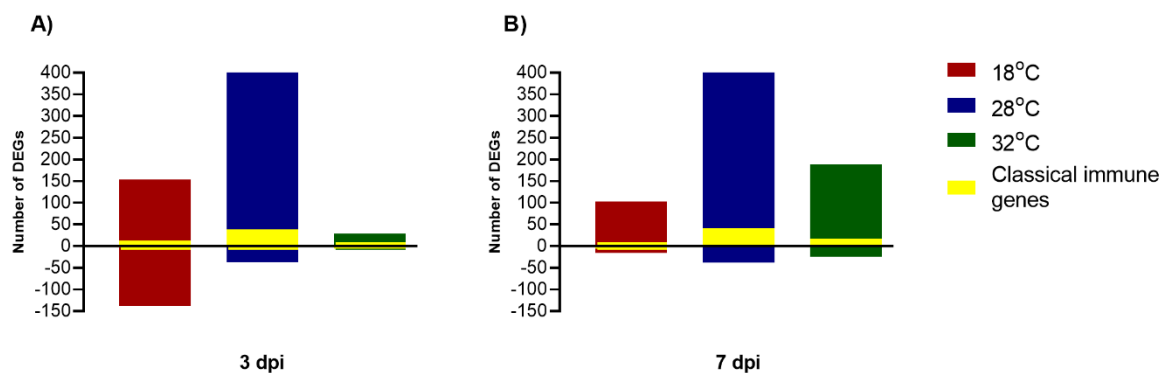

129  
130 **Fig 2.** Differentially expressed genes (DEGs) in response to CHIKV infection in *Ae. aegypti*.  
131 Mosquitoes were held at 3 ambient temperatures and sampled at **A)** 3 dpi and **B)** 7 dpi. DEGs were  
132 identified using DESeq2, with a Fold Change (FC) >  $\pm 1.5$  and adjusted p-value < 0.05. The number  
133 of DEGs involved in the classical immune response is shown in yellow.

134 Across all temperatures and time points, the top 10 upregulated (in terms of fold-change) DEGs  
135 were predominantly genes known to be involved in thermoregulatory responses, such as heat  
136 shock proteins (particularly *hsp70*) and lethal (2) essential for life protein (*l2efl*) (**Table 1**). By  
137 contrast, the top 10 downregulated DEGs were more heterogeneous across all temperatures and  
138 both time points. At 3 dpi, proteolysis, intracellular signal transduction, protein-binding and  
139 oxidation-reduction process related genes were among the top 10 downregulated genes at 18  
140 °C. At 28 °C, downregulated genes were predominantly involved in oxidation-reduction, cell  
141 division, zinc ion binding, nucleic acid binding and integral component of membrane (**Table**  
142 **1**). Four genes downregulated at 32 °C were related to oxidation-reduction and protein binding.  
143 At 7 dpi, RNA binding, pigment binding, lipid binding and transport, proteolysis and integral  
144 component of membrane gene were among the top 10 downregulated genes at 18 °C (**Table**  
145 **1**). Microtubule binding, catalytic activity, odorant binding, membrane and ionotropic  
146 glutamate receptor activity genes were among the most downregulated DEGs at 28 °C, while  
147 odorant binding, nucleotide binding, ATP binding, phototransduction and transferase genes  
148 were downregulated at 32 °C. Across all temperature regimes and dpi, we observed 11  
149 lncRNAs being among the top 10 downregulated, but no lncRNAs were present among the top  
150 10 upregulated genes (**Table 1**). At 3 dpi, 14 genes were upregulated under all three  
151 temperature regimes in response to CHIKV infection, and comprised 10 HSPs, nucleic acid  
152 binding and genes involved in regulation of cell cycle (**Table 2**). By 7 dpi, 22 genes that were  
153 upregulated across all temperature regimes (**Table 2**) with a similar pattern observed in the  
154 categories of genes involved. There were no downregulated DEGs in common across the three  
155 temperatures, for either time points. Overall, the results indicate similar categories of  
156 upregulated genes, but far greater heterogeneity of downregulated DEGs, among the  
157 temperature regimes in response to CHIKV infection.

158 **Table 1.** Top 10 differentially expressed genes (DEGs) ranked by fold change in CHIKV-infected *Ae. aegypti* versus uninfected controls, held at three  
 159 different temperatures (T°C) and sampled at two time points post infection (dpi).

| Dpi | T °C  | Upregulated        |                                   |             |           | Downregulated      |                                                                                                                    |             |          |
|-----|-------|--------------------|-----------------------------------|-------------|-----------|--------------------|--------------------------------------------------------------------------------------------------------------------|-------------|----------|
|     |       | VectorBase Gene ID | Gene description                  | Fold Change | P-adj.    | VectorBase Gene ID | Gene description                                                                                                   | Fold Change | P-adj.   |
| 3   | 18 °C | AAEL020330         | Heat shock protein 70 A1-like     | 46.38       | 6.17E-44  | AAEL009165         | Protein G12                                                                                                        | -8.49       | 6.03E-11 |
|     |       | AAEL017976         | Heat shock protein HSP70          | 38.00       | 3.82E-42  | AAEL024161         | LncRNA                                                                                                             | -4.33       | 2.03E-04 |
|     |       | AAEL013346         | L2efl                             | 35.25       | 2.98E-37  | AAEL023395         | LncRNA                                                                                                             | -4.29       | 5.01E-06 |
|     |       | AAEL013345         | Alpha A-crystallin, putative      | 31.05       | 2.25E-31  | AAEL012766         | Cytochrome P450                                                                                                    | -4.24       | 4.53E-07 |
|     |       | AAEL013350         | Heat shock protein 26kD, putative | 24.42       | 1.50E-27  | AAEL012717         | WD-repeat protein                                                                                                  | -3.81       | 1.42E-03 |
|     |       | AAEL013348         | L2efl                             | 21.51       | 3.51E-26  | AAEL008609         | Zinc carboxypeptidase                                                                                              | -3.77       | 9.81E-07 |
|     |       | AAEL013339         | Alpha A-crystallin, putative      | 19.17       | 1.59E-21  | AAEL001693         | Serine-type endopeptidase                                                                                          | -3.56       | 9.69E-04 |
|     |       | AAEL013349         | L2efl                             | 15.77       | 1.58E-20  | AAEL013118         | Insect allergen-related protein                                                                                    | -3.53       | 2.61E-03 |
|     |       | AAEL017975         | Heat shock protein HSP70          | 14.48       | 2.70E-18  | AAEL008701         | Myoinositol oxygenase                                                                                              | -3.52       | 2.31E-03 |
|     |       | AAEL013351         | L2efl                             | 14.15       | 1.89E-25  | AAEL009843         | Serine-type endopeptidase                                                                                          | -3.51       | 2.39E-03 |
| 3   | 28 °C | AAEL013350         | Heat shock protein 26kD, putative | 201.82      | 5.02E-120 | AAEL012628         | DNA-binding transcription factor activity                                                                          | -6.98       | 1.51E-09 |
|     |       | AAEL013339         | Alpha A-crystallin, putative      | 73.87       | 2.21E-85  | AAEL000507         | Chorion peroxidase                                                                                                 | -3.94       | 5.00E-06 |
|     |       | AAEL020330         | Heat shock protein 70 A1-like     | 69.08       | 9.43E-56  | AAEL018189         | PCR Gastrin/Cholecystokinin Family                                                                                 | -3.29       | 9.96E-04 |
|     |       | AAEL017976         | Heat shock protein HSP70          | 66.81       | 3.41E-57  | AAEL020175         | LncRNA                                                                                                             | -3.27       | 3.58E-03 |
|     |       | AAEL017975         | Heat shock protein HSP70          | 59.88       | 2.05E-66  | AAEL005507         | Inhibitory pou (eukaryotic transcription factors containing a bipartite DNA binding domain referred to as the POU) | -3.26       | 4.12E-03 |
|     |       | AAEL013346         | L2efl                             | 47.65       | 1.21E-46  | AAEL009899         | Uncharacterized LOC5572580, cellular component/membrane/nucleotide binding                                         | -2.87       | 1.11E-04 |
|     |       | AAEL022253         | Pseudogene                        | 28.78       | 4.88E-35  | AAEL012566         | Zinc finger C2H2-type/integrase DNA-binding domain                                                                 | -2.75       | 1.70E-02 |
|     |       | AAEL013348         | L2efl                             | 27.20       | 1.69E-43  | AAEL010855         | cdc6                                                                                                               | -2.65       | 2.37E-03 |

|            |                                          |                          |                                   |          |            |            |                                                                                        |          |           |
|------------|------------------------------------------|--------------------------|-----------------------------------|----------|------------|------------|----------------------------------------------------------------------------------------|----------|-----------|
|            | AAEL027610                               | Heat shock protein 70 A1 | 25.78                             | 3.18E-27 | AAEL022900 | LncRNA     | -2.58                                                                                  | 3.30E-02 |           |
|            | AAEL024512                               | Pseudogene               | 13.27                             | 3.61E-30 | AAEL022382 | LncRNA     | -2.45                                                                                  | 3.00E-02 |           |
| 3          | 32 °C                                    | AAEL013339               | Alpha A-crystallin, putative      | 5.61     | 2.37E-07   | AAEL024207 | Uncharacterized LOC5568345, binding and developmental process involved in reproduction | -2.97    | 2.28E-02  |
|            |                                          | AAEL013349               | L2efl                             | 4.16     | 2.05E-04   | AAEL014019 | Cytochrome P450                                                                        | -2.71    | 4.47E-02  |
|            |                                          | AAEL013346               | L2efl                             | 4.07     | 2.39E-04   | AAEL000668 | Protein flightless-1 homolog                                                           | -2.66    | 4.39E-02  |
|            |                                          | AAEL013345               | Alpha A-crystallin, putative      | 3.88     | 4.42E-04   | AAEL011126 | Alcohol dehydrogenase                                                                  | -2.42    | 4.85E-02  |
|            |                                          | AAEL017976               | Heat shock protein HSP70          | 3.84     | 4.42E-04   |            |                                                                                        |          |           |
|            |                                          | AAEL013348               | L2efl                             | 3.71     | 5.17E-04   |            |                                                                                        |          |           |
|            |                                          | AAEL020330               | Heat shock protein 70 A1-like     | 3.58     | 1.55E-03   |            |                                                                                        |          |           |
|            |                                          | AAEL013350               | Heat shock protein 26kD, putative | 3.55     | 1.67E-03   |            |                                                                                        |          |           |
|            |                                          | AAEL013351               | L2efl                             | 3.10     | 6.31E-04   |            |                                                                                        |          |           |
| AAEL009682 | Serine collagenase 1 precursor, putative | 2.92                     | 2.21E-02                          |          |            |            |                                                                                        |          |           |
| 7          | 18 °C                                    | AAEL013346               | L2efl                             | 18.08    | 3.46E-39   | AAEL006151 | Serine protease, putative                                                              | -2.83    | 0.0028558 |
|            |                                          | AAEL013350               | Heat shock protein 26kD, putative | 14.84    | 6.50E-30   | AAEL009567 | Apolipoprotein D, putative                                                             | -2.80    | 0.0028558 |
|            |                                          | AAEL013339               | Alpha A-crystallin, putative      | 13.14    | 4.79E-28   | AAEL010620 | Uncharacterized protein C6orf203/ RNA binding                                          | -2.44    | 0.0208878 |
|            |                                          | AAEL013348               | L2efl                             | 11.02    | 2.72E-31   | AAEL029039 | CTLGA4                                                                                 | -2.42    | 0.0017231 |
|            |                                          | AAEL013351               | L2efl                             | 9.18     | 1.25E-23   | AAEL008789 | Apolipoprotein III, putative                                                           | -2.39    | 0.0072375 |
|            |                                          | AAEL017975               | Heat shock protein HSP70          | 8.86     | 1.58E-18   | AAEL018189 | PCR Gastrin/Cholecystokinin Family                                                     | -2.36    | 0.02325   |
|            |                                          | AAEL017976               | Heat shock protein HSP70          | 8.83     | 6.82E-18   | AAEL025334 | Alpha-macroglobulin, receptor-binding domain superfamily                               | -2.31    | 0.0312282 |
|            |                                          | AAEL013349               | L2efl                             | 5.62     | 3.75E-11   | AAEL020035 | Putative uncharacterized protein DDB_G0283431 (LOC110679006)                           | -2.28    | 0.0304633 |
|            |                                          | AAEL022253               | Pseudogene                        | 5.43     | 5.03E-10   | AAEL013432 | Serine protease, putative                                                              | -2.06    | 0.0257032 |
|            |                                          | AAEL024512               | Pseudogene                        | 5.23     | 8.49E-10   | AAEL006377 | Leucine-rich immune protein (Coil-less)                                                | -1.90    | 0.0236374 |
| 7          | 28 °C                                    | AAEL013350               | Heat shock protein 26kD, putative | 8.67     | 1.52E-21   | AAEL024284 | Pseudogene                                                                             | -2.36    | 2.75E-03  |

|   |            |                               |                                       |          |            |                                                              |                                            |          |          |
|---|------------|-------------------------------|---------------------------------------|----------|------------|--------------------------------------------------------------|--------------------------------------------|----------|----------|
|   | AAEL017975 | Heat shock protein HSP70      | 8.43                                  | 5.11E-21 | AAEL015566 | Odorant binding protein OBP62                                | -2.25                                      | 5.62E-03 |          |
|   | AAEL010434 | Vitellogenin-A1 precursor     | 6.21                                  | 3.55E-15 | AAEL021449 | Uncharacterized LOC110681489                                 | -2.18                                      | 9.18E-03 |          |
|   | AAEL020330 | Heat shock protein 70 A1-like | 5.74                                  | 1.78E-13 | AAEL024757 | Ionotropic glutamate receptor                                | -2.17                                      | 9.37E-03 |          |
|   | AAEL013346 | l2efl                         | 5.43                                  | 1.17E-12 | AAEL002173 | TRAF3-interacting protein 1                                  | -2.10                                      | 1.43E-02 |          |
|   | AAEL025531 | Glycine-rich protein 5-like   | 4.95                                  | 3.80E-12 | AAEL022124 | LncRNA                                                       | -2.01                                      | 2.09E-02 |          |
|   | AAEL002655 | Matrix metalloproteinase      | 4.91                                  | 9.82E-12 | AAEL008454 | Isochorismatase-like                                         | -1.95                                      | 2.41E-02 |          |
|   | AAEL025126 | Glycine-rich protein 23-like  | 4.91                                  | 9.82E-12 | AAEL019629 | Putative leucine-rich repeat-containing protein DDB_G0290503 | -1.95                                      | 3.32E-02 |          |
|   | AAEL006883 | regulation of cell cycle      | 4.90                                  | 5.40E-18 | AAEL026107 | LncRNA                                                       | -1.94                                      | 2.00E-02 |          |
|   | AAEL017976 | Heat shock protein HSP70      | 4.74                                  | 1.12E-10 | AAEL004576 | Uncharacterised protein family, zinc metallopeptidase-like   | -1.92                                      | 3.86E-02 |          |
| 7 | 32 °C      | AAEL017976                    | Heat shock protein HSP70              | 7.57     | 5.31E-12   | AAEL024449                                                   | Pseudogene                                 | -3.71    | 1.09E-04 |
|   |            | AAEL027610                    | Heat shock protein 70 A1              | 7.37     | 1.38E-11   | AAEL018041                                                   | UDP-glucuronosyltransferase 1-1-like       | -3.26    | 7.04E-04 |
|   |            | AAEL017975                    | Heat shock protein HSP70              | 5.37     | 6.81E-08   | AAEL006938                                                   | Serine--tRNA synthetase-like protein Slimp | -3.15    | 4.13E-04 |
|   |            | AAEL020330                    | Heat shock protein 70 A1-like         | 4.83     | 1.04E-06   | AAEL020306                                                   | LncRNA                                     | -2.92    | 3.57E-03 |
|   |            | AAEL027829                    | Pancreatic lipase-related protein 2   | 4.31     | 3.30E-06   | AAEL024183                                                   | LncRNA                                     | -2.87    | 4.55E-03 |
|   |            | AAEL014020                    | Uncharacterized LOC5579148            | 4.28     | 9.71E-06   | AAEL000035                                                   | Odorant binding protein (Obp57)            | -2.86    | 4.53E-03 |
|   |            | AAEL013350                    | Heat shock protein 26kD, putative     | 4.22     | 1.25E-05   | AAEL005621                                                   | Long wavelength sensitive opsin            | -2.82    | 5.52E-03 |
|   |            | AAEL003345                    | Argininosuccinate lyase               | 3.70     | 1.59E-05   | AAEL023039                                                   | LncRNA                                     | -2.43    | 1.12E-02 |
|   |            | AAEL022059                    | Pseudogene                            | 3.60     | 2.08E-04   | AAEL026029                                                   | LncRNA                                     | -2.42    | 1.98E-02 |
|   |            | AAEL001098                    | Clip-domain serine protease, putative | 3.55     | 1.42E-06   | AAEL022225                                                   | Uncharacterized LOC5565165                 | -2.40    | 2.24E-02 |

160 L2efl: Lethal (2) essential for life protein, l2efl

161 **Table 2.** Genes observed to be differentially expressed in common across the three temperatures, in  
 162 CHIKV-infected *Ae. aegypti* sampled at two time points post infection (dpi).

| 3 dpi      |                                                    | 7 dpi      |                                               |
|------------|----------------------------------------------------|------------|-----------------------------------------------|
| Gene ID    | Description                                        | Gene ID    | Description                                   |
| AAEL020330 | Heat shock protein 70 A1-like (LOC110674152), mRNA | AAEL013346 | Hsp20 domain                                  |
| AAEL017976 | HSP70Bb                                            | AAEL013350 | Hsp20 domain                                  |
| AAEL013346 | Hsp20 domain                                       | AAEL017975 | Heat shock protein HSP70                      |
| AAEL013345 | Hsp20 domain                                       | AAEL017976 | HSP70Bb                                       |
| AAEL013350 | Hsp20 domain                                       | AAEL013347 | Hsp20 domain                                  |
| AAEL013348 | Lethal (2) essential for life protein, l2efl       | AAEL022079 | LncRNA                                        |
| AAEL013351 | Lethal (2) essential for life protein, l2efl       | AAEL019751 | Uncharacterised LOC5571127, mRNA              |
| AAEL013339 | Alpha A-crystallin, putative                       | AAEL022253 | Pseudogene                                    |
| AAEL013349 | Lethal (2) essential for life protein, l2efl       | AAEL022059 | Pseudogene                                    |
| AAEL023321 | Heat shock protein 70 A1-like                      | AAEL027610 | Heat shock protein 70 A1                      |
| AAEL004090 | SERAC1                                             | AAEL006883 | Conserved hypothetical protein, Fox O pathway |
| AAEL006883 | Conserved hypothetical protein, Fox O pathway      | AAEL026008 | Uncharacterised LOC110675610                  |
| AAEL010068 | Putative uncharacterized protein DDB_G0277255      | AAEL013770 | Zinc finger protein                           |
| AAEL024560 | Dendritic arbor reduction protein 1                | AAEL003505 | Jun                                           |
|            |                                                    | AAEL008622 | Jnk                                           |
|            |                                                    | AAEL003728 | Uncharacterized LOC5578871                    |
|            |                                                    | AAEL023591 | Myb-like protein V                            |
|            |                                                    | AAEL028247 | Uncharacterized LOC110678629                  |
|            |                                                    | AAEL013341 | Lethal (2) essential for life protein, l2efl  |
|            |                                                    | AAEL020330 | Heat shock protein 70 A1-like                 |
|            |                                                    | AAEL013345 | Alpha A-crystallin, putative                  |
|            |                                                    | AAEL002124 | CLIPD6                                        |

163

164

165 **Identification of *Ae. aegypti* genes involved in classical and non-classical immune**  
 166 **response and updating annotations of AegL5.2**

167 To determine how the expression of known mosquito immune genes changes with temperature  
 168 in response to CHIKV infection, we first identified from ImmunoDB database 445 genes listed  
 169 under 27 families that were similarly annotated in AegL1 and AegL5.2. This indicated that  
 170 166 genes were no longer available with the same gene ID in the latest genome annotation

171 release AaegL5.2. Since the release of AaegL1, a number of additional genes have been  
172 identified to be involved in mosquito immune response. Using a literature review, we identified  
173 10 additional gene families, resulting in a total of 37 gene families implicated in mosquito  
174 immunity (**Supplementary Table 4**), producing a final list of 998 genes. The list was divided  
175 into classical or non-classical components (**Supplementary Tables 5 and 6**) [4, 27-34]. Genes  
176 already identified and directly involved in humoral and cellular immune response were  
177 considered as classical immune genes [35]. Genes outside of these classical immune pathways  
178 that are transcriptionally altered in response to arboviral infections in *Ae. aegypti* were  
179 considered as non-classical immune genes [36]. We next considered DEG patterns in classical  
180 immune genes, categorised under the four main processes of immune response: pathogen  
181 recognition, immune signalling, pathogen destruction and immune gene modulation.

182

### 183 **Pathogen recognition receptor (PRR) genes**

184 At both time points sampled post CHIKV infection, the majority of PRR DEGs were observed  
185 in mosquitoes held at 28 °C (n DEGs=24; **Fig. 3**), with only a handful detected at the other  
186 temperatures. The number of PRR DEGs observed at 28 °C stayed largely similar at both time  
187 points (3 dpi n=24; 7 dpi n=30). Strikingly, only two PRRs were found to be differentially  
188 expressed at 32 °C at 3 dpi (**Fig. 3A**), although by 7 dpi that number had increased 6-fold (**Fig.**  
189 **3B**). By contrast, the number of PRRs differentially expressed at 18 °C (n=8) was halved by 7  
190 dpi. PRR DEGs were predominantly CLIP domain serine proteases, leucine-rich immune  
191 receptors (LRIM) and leucine-rich repeat-containing proteins (LRR), galectins, fibrinogen  
192 related proteins (FREP), ML/Niemann-pick receptors, peptidoglycan recognition proteins  
193 (PGRP), scavenger receptors (SCR), and thioester proteins (TEP). At 3 dpi, two CLIPs  
194 (AAEL003632: *CLIPB39*, AAEL012712: *CLIPC13*) and one TEP (AAEL008607: *TEP3*) were

195 found in common to mosquitoes held at 18 °C and at 28 °C. At 7 dpi, we observed *CLIPD6*  
196 (AAEL002124) to be upregulated under all temperatures.



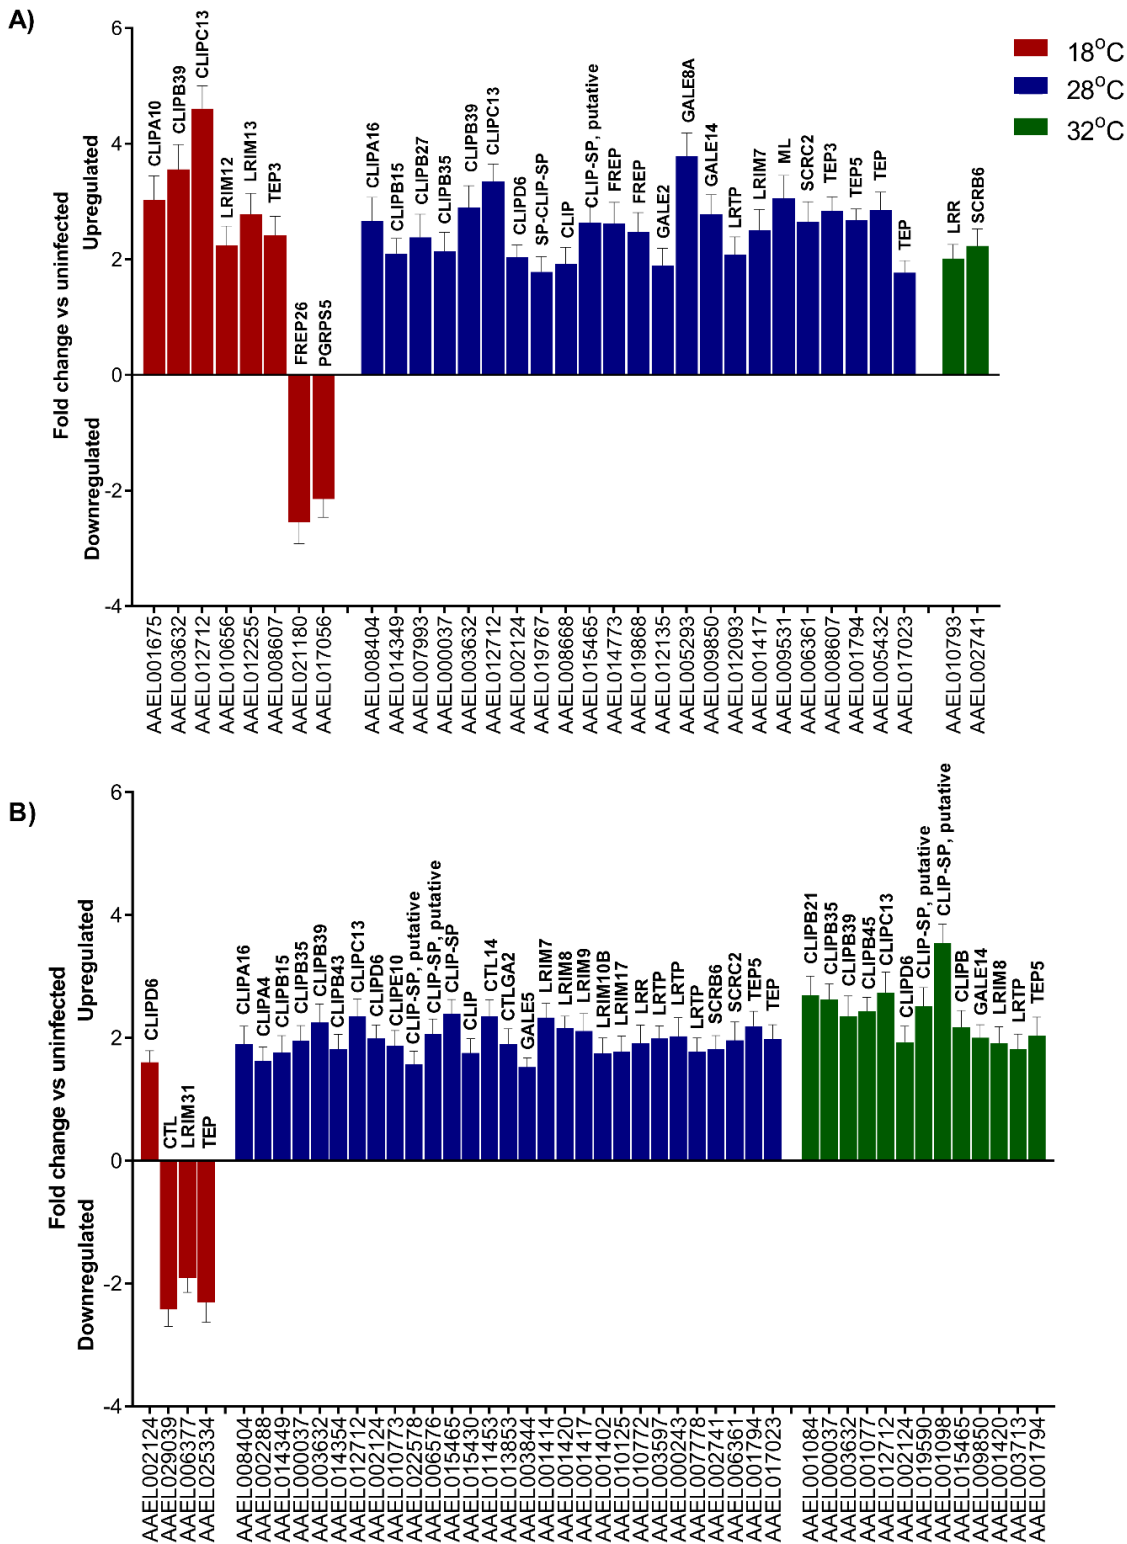

197 **Fig. 3.** Differentially expressed genes (DEGs) related to pathogen recognition at **A)** 3 dpi and **B)** 7  
 198 dpi, in CHIKV-infected *Ae. aegypti* versus uninfected controls. CTL: C-type lectin; LRIM: leucine-  
 199 rich immune receptors; LRR: leucine-rich repeat-containing proteins; LRTP: leucine-rich  
 200 transmembrane protein; FREP: fibrinogen related proteins; ML: Niemann-Pick receptors; GALE:  
 201 galectin; PGRP: peptidoglycan recognition proteins; SCR: scavenger receptors; TEP: thioester  
 202 proteins.

## 203 Immune signalling genes

204 We found a complete absence of immune signalling DEGs at 32 °C at the 3 dpi, with only two  
 205 DEGs detected by 7 dpi (**Fig. 4**). Upregulation of *Cactus* (AAEL000709), *Toll 5A*  
 206 (AAEL007619) and downregulation of *TRAF6* (AAEL028236) were only found at 18 °C (**Fig.**  
 207 **4**). *Kayak* (AAEL008953) and *AP-1* (AAEL003505) were expressed at both time points at 18  
 208 °C and 28 °C, but only *AP-1* was observed at 32 °C at 7 dpi. The repertoire of immune signalling  
 209 genes was stable across the two time points at 28 °C and included two *Spätzle* genes  
 210 (AAEL001929 and AAEL013434), *Relish 2* (AAEL007624) gene and a hypothetical protein  
 211 from JAK-STAT pathway (AAEL009645).

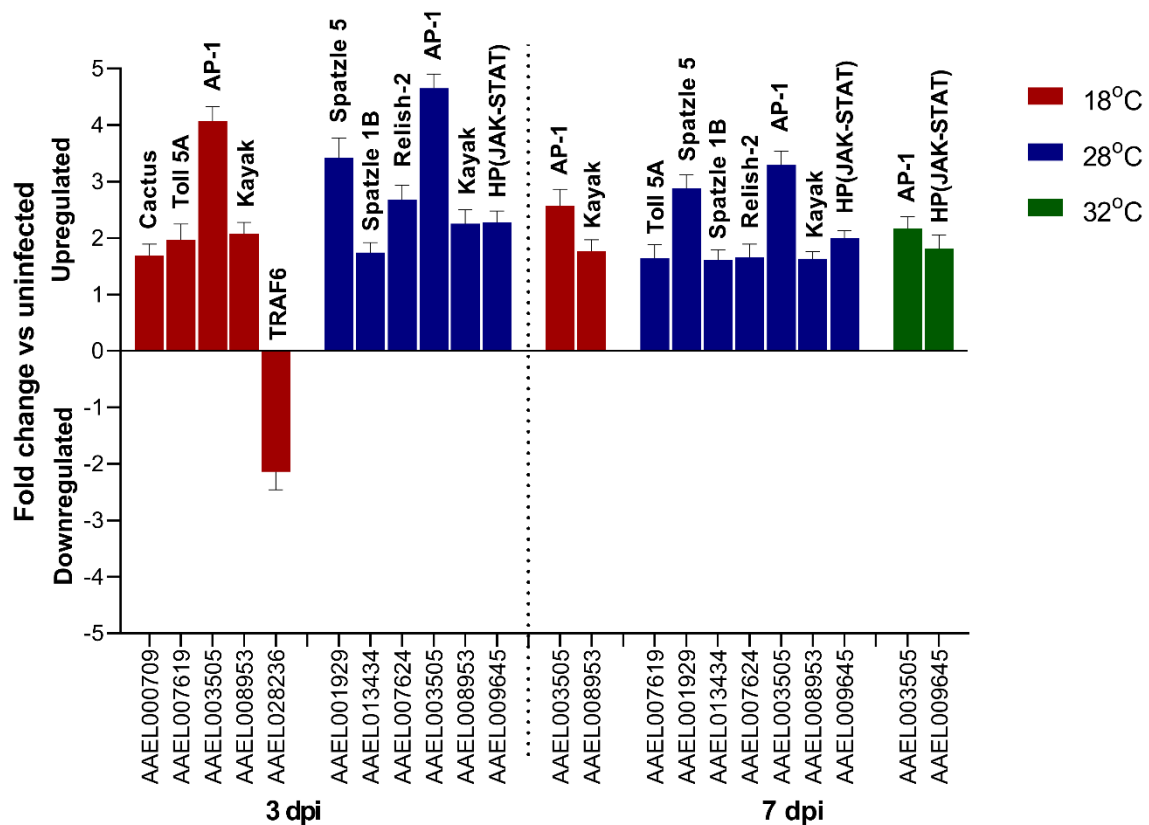

212

213 **Fig. 4.** Differentially expressed genes (DEGs) related to immune signalling at A) 3 dpi and B) 7 dpi,  
 214 in CHIKV-infected *Ae. aegypti* versus uninfected controls. HP indicates hypothetical protein.

215

## 216 Pathogen destruction and immune modulation genes

217 There were no pathogen destruction or related effector DEGs in mosquitoes held at 32 °C at 3  
218 dpi, although *Caspase 8* (AAEL014348) was upregulated at 7 dpi (**Fig. 5A**). *Caspase 8* and  
219 *Dicer-2* (AAEL006794) were upregulated at 18 °C at 3 dpi but were not differentially  
220 expressed at 7 dpi. Upregulation of *Dicer-2* expression in response to CHIKV was only  
221 observed at 18 °C and 28 °C. In contrast, the mosquitoes kept at 28 °C differentially expressed  
222 most of the previously identified pathogen destruction mechanisms including antimicrobial  
223 peptide (*AMP*) genes (*Attacin*, *Defensin* and *Cecropin*) and apoptosis genes (*Caspase 8* and  
224 *IAP 1*). By 7 dpi, most expression of DEGs was suppressed at 18 °C and reduced at 28 °C. We  
225 did not observe any immune modulation genes significantly upregulated at 32 °C at 3 dpi,  
226 although by 7 dpi two serpins were observed (**Fig. 5 B**). Conversely, we observed three immune  
227 modulation DEGs (AAEL003182: *SRPN26*; AAEL010235: allergen; AAEL006347: *apyrase*)  
228 downregulated at 18 °C at 3 dpi but none at 7 dpi.

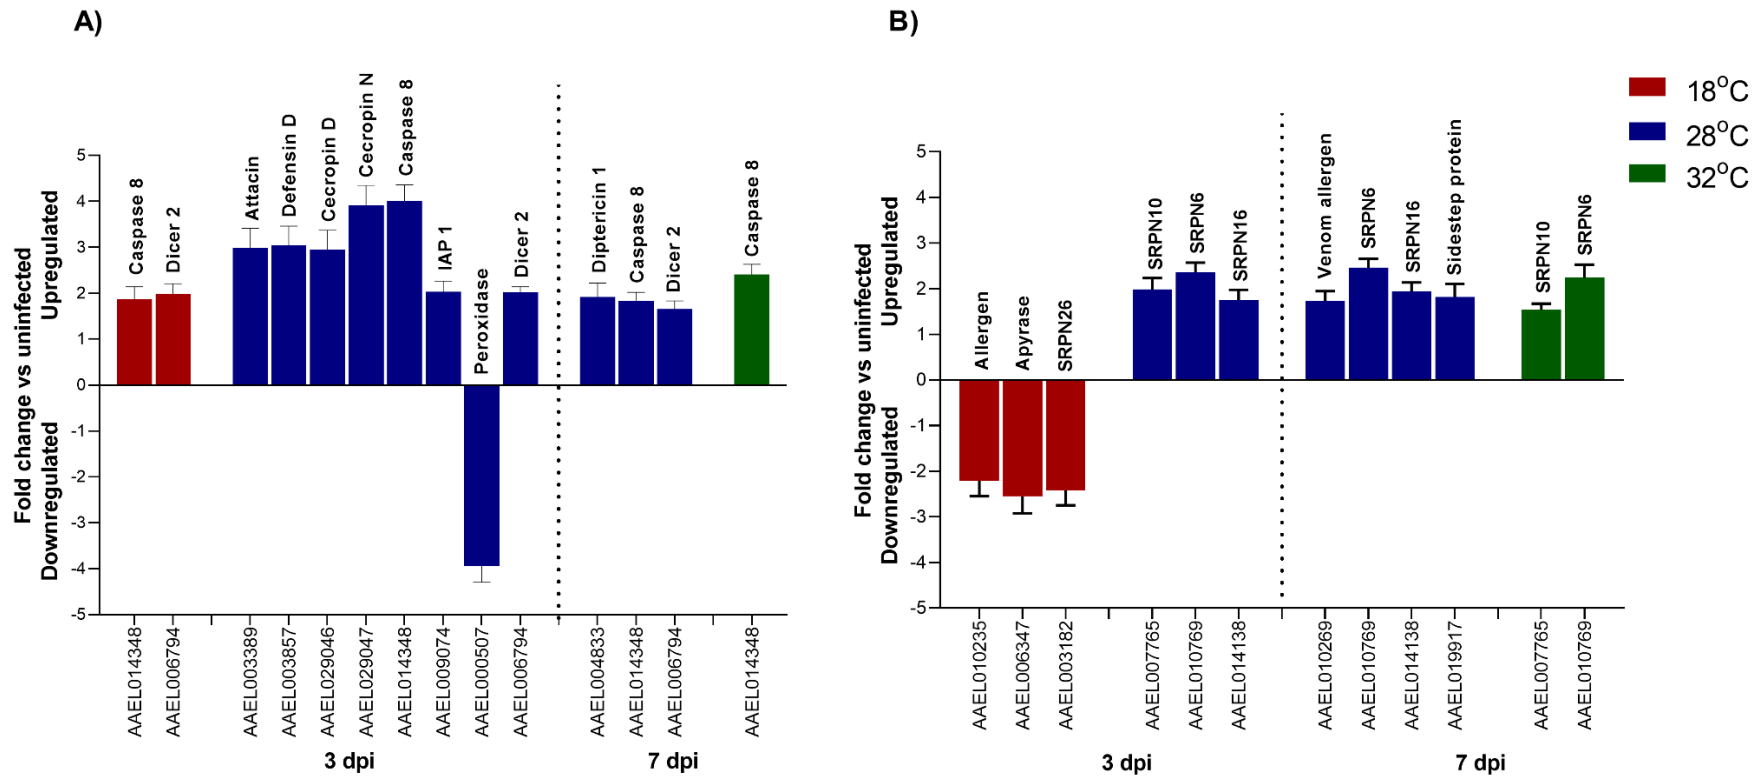

229

230

231

**Fig. 5.** Differentially expressed genes (DEGs) related to **A)** pathogen destruction and **B)** immune modulation, in CHIKV-infected *Ae. aegypti* versus uninfected controls sampled at two time points (dpi). SRPN: *serpin*.

## 232 **Gene ontology (GO) mapping differs across temperature and time**

233 The lists of DEGs identified for each temperature and time point sampled were submitted to  
234 the DAVID bioinformatics (V6.8) functional annotation tool. The resulting Gene Ontology  
235 (GO) terms were classified using WEGO 2.0 web gene ontology annotation plotting. Gene  
236 ontologies in the three major categories of Cellular Location, Molecular Function and  
237 Biological Processes differed according to temperature and time of sampling post infection  
238 (**Fig. 6**). At 3 dpi, a total of 14 cellular location terms were obtained from the DEGs identified  
239 (**Fig. 6A** left panel) with the majority being present at 18 °C. Consistent with the low number  
240 of DEGs found at 32 °C, only very few cellular location terms were mapped for this  
241 temperature. Only five GO terms pertaining to cellular locations were mapped at all three  
242 temperatures. At 7 dpi, a similar number of cellular locations related to DEGs was mapped as  
243 for 3 dpi (n locations = 13, **Fig. 6A** right panel). The highest number of cellular locations was  
244 observed for mosquitoes held at 28 °C. At 18 °C, almost all (8/9) cellular locations comprised  
245 upregulated DEGs. Both 28 °C and 32 °C were similar with respect to DEG expression. Cell  
246 junction, supramolecular complex, synapse and synapse part related genes were upregulated  
247 only at 28 °C.

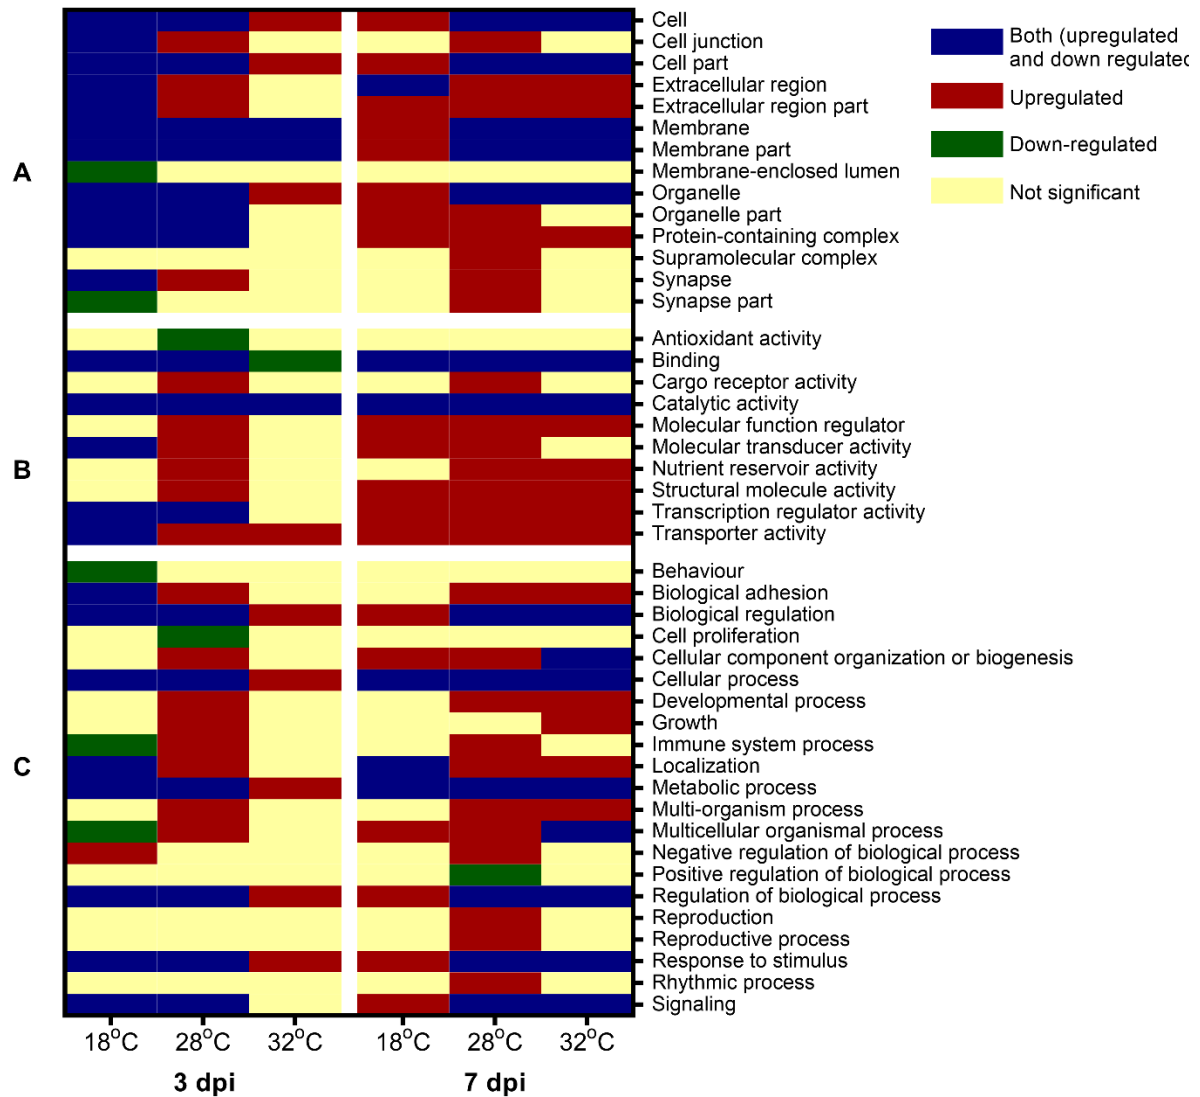

248

249 **Fig 6.** Gene Ontology analysis of differentially expressed genes (DEGs) in CHIKV-infected *Ae.*  
 250 *aegypti* mosquitoes, held at three temperatures and sampled at two time points post infection (dpi). **A)**  
 251 Cellular locations; **B)** Molecular functions; **C)** Biological processes.

252

253 At 3 dpi, DEGs were related to a total of 10 molecular functions (**Fig. 6B** left panel), with  
 254 catalytic activity significantly differentially expressed at all temperatures. Five, 10 and 3  
 255 molecular functions were differentially expressed at 18 °C, 28 °C and 32 °C respectively. Five  
 256 out of six molecular functions identified in mosquitoes held at 18 °C post infection had  
 257 significant DEGs (both up and downregulated) while the remaining category, behaviour, was

258 downregulated. Binding was downregulated only at 32 °C, but transporter activity was  
259 upregulated. Cargo receptor activity, molecular function regulator, nutrient reservoir activity  
260 and structural molecular activity were functions observed only at 28 °C. Mosquitoes held at the  
261 other two temperatures had no DEGs related to these molecular functions. At 7 dpi, six out of  
262 nine molecular functions were found in common across all temperatures (**Fig 6B** right panel).  
263 Cargo receptor activity was only significantly upregulated at 28 °C. Molecular transducer  
264 activity was observed to be upregulated at 18 °C and 28 °C, whereas nutrient reservoir activity  
265 was upregulated at 28 °C and 32 °C.

266 DEGs in CHIKV-infected mosquitoes versus controls sampled at 3 dpi related 17 biological  
267 processes, across the three different temperatures (**Fig 6C** left). Mosquitoes from 28 °C  
268 displayed the highest number (15/17) of differentially expressed biological processes, whereas  
269 those kept at 32 °C displayed the lowest (5/21). Downregulation of behaviour was unique for  
270 mosquitoes held at 18 °C. On the other hand, downregulation of cell proliferation and  
271 upregulation of cellular component organisation of biogenesis and development process were  
272 exclusively found at 28 °C. Immune system and multicellular organismal processes were  
273 downregulated at 18 °C but upregulated at 28 °C. At 7 dpi, 19 biological functions were  
274 identified from DEGs across all temperatures (**Fig 6C** right), with the highest number (n=18)  
275 identified at 28 °C. Upregulation of immune system process and negative regulation of  
276 reproduction were exclusively found at 28 °C. The majority (6/9) of the biological processes  
277 found at 18 °C consisted of upregulated DEGs. Further, 62% (8/13) of the biological processes  
278 at 32 °C were significantly altered through up- and downregulation.

279

## 280 **Impact of temperature on functional pathway enrichment**

281 KEGG pathways obtained from the DAVID Bioinformatics analysis above were manually  
282 categorised into KEGG orthologies (groups of pathways) to determine functional enrichment.

283 The vast majority of pathways altered by temperature, at both time points, were involved in  
284 metabolism (**Fig. 7**, top panels denoted by **A**). At 3 dpi, 36 metabolic pathways differed  
285 significantly between CHIKV-infected and control mosquitoes across all temperatures. The  
286 majority of pathways found at 18 °C were downregulated, suggesting some degree of metabolic  
287 shutdown in infected mosquitoes. Downregulated pathways were mostly related to  
288 carbohydrate, amino acid and glycan metabolism (**Fig. 7**, top panels denoted by **A**). At 32 °C,  
289 all three enriched pathways were downregulated and categorised under metabolic pathways  
290 and carbohydrate metabolism. By day 7 post infection, 44 metabolic pathways differed  
291 between CHIKV-infected and control mosquitoes. Unlike for 3 dpi, there was no difference in  
292 enrichment of metabolic pathways at 18 °C between the two mosquito groups. By contrast, 21  
293 pathways were upregulated at 32 °C at this timepoint compared to only three at 3 dpi. A greater  
294 number of enriched metabolic pathways was also observed in mosquitoes at 28 °C at 7 dpi  
295 versus 3 dpi. Ascorbate and aldarate metabolism (aag00053), glycerophospholipid metabolism  
296 (aag00564) and ether lipid metabolism (aag00565) DEGs were only observed at 32 °C.



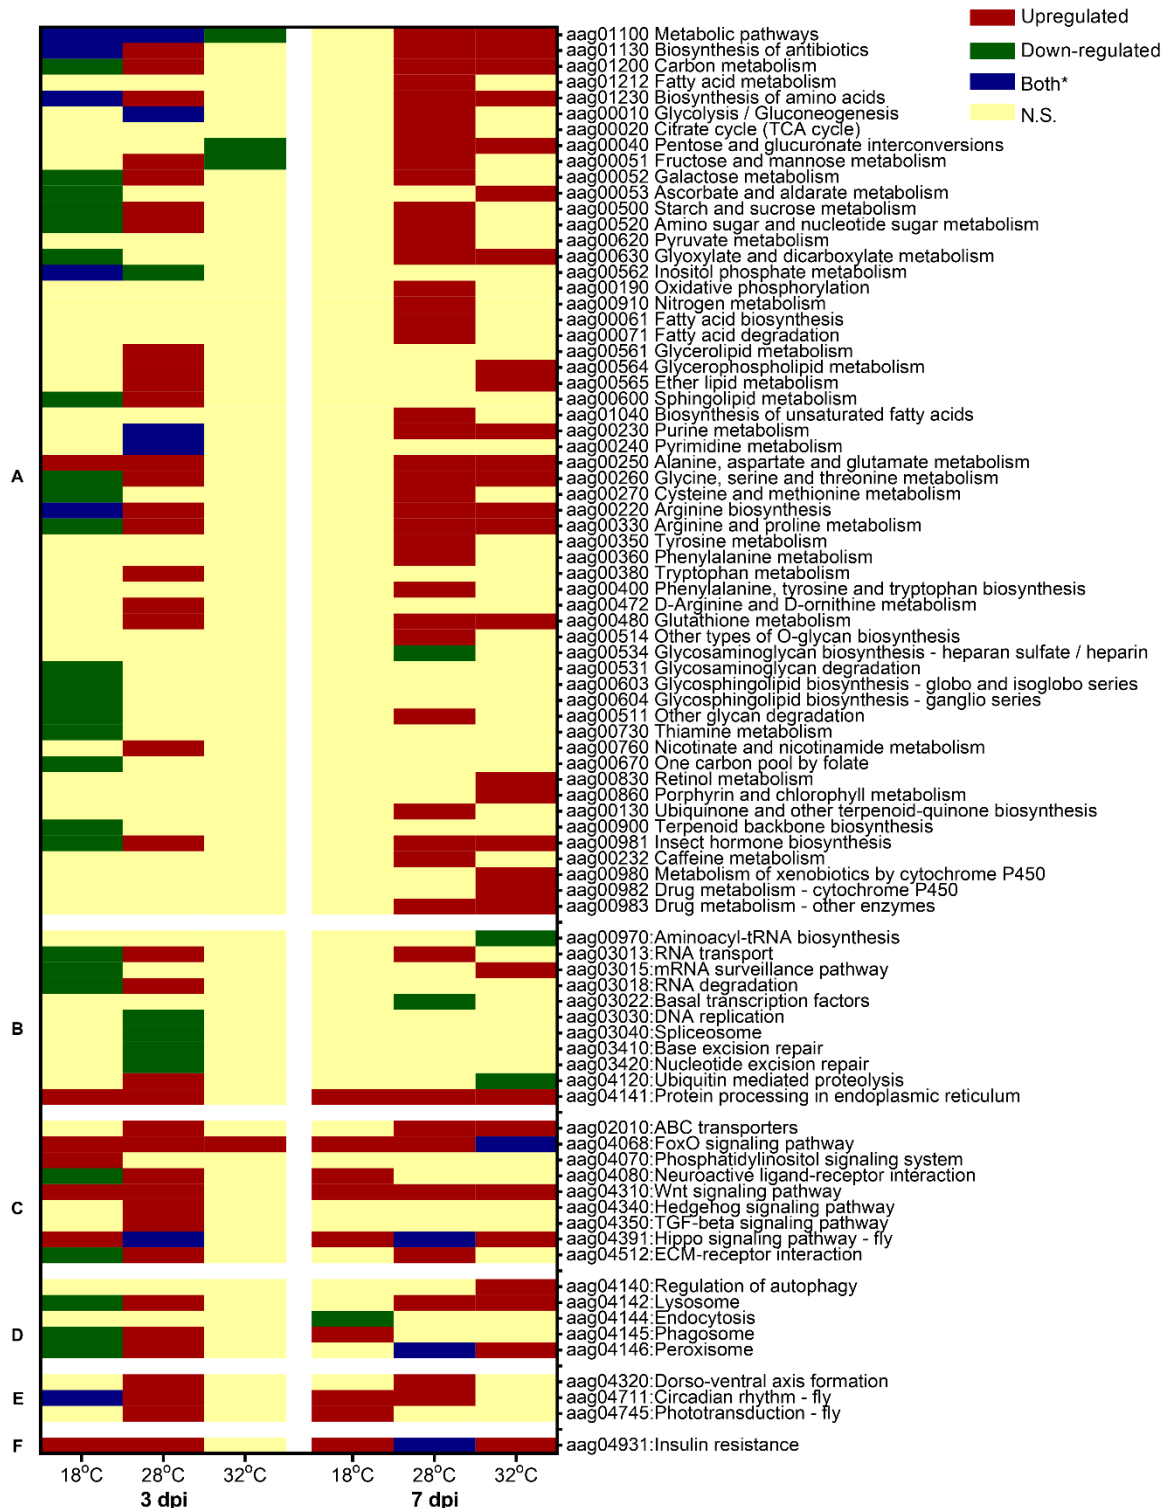

297 **Fig 7.** KEGG pathway analysis for DEGs found at 3dpi and 7dpi. **A)** metabolic pathways;  
 298 **B)** genetic information processing; **C)** environmental information processing; **D)** cellular  
 299 processes; **E)** organismal systems; **F)** human diseases; ‘aag’ followed by numbers indicate  
 300 the KEGG pathway identification number. \*Denotes both upregulated and downregulated  
 301 components to the pathway.

302 Pathways involved in genetic and environmental information processing and cellular processes  
303 also showed enrichment in CHIKV-infected mosquitoes compared with uninfected controls.  
304 At 3 dpi, involvement of pathways in these categories was observed only at 18 °C and 28 °C,  
305 with only FoxO signalling present at 32 °C. Almost half of the 15 non-metabolic pathways  
306 enriched at 18 °C were downregulated (**Fig. 7B-F**). Pathways involved in response to RNA  
307 virus infection such as lysosome, phagosome, peroxisome, RNA transport and RNA  
308 degradation were significantly downregulated at 18 °C but upregulated at 28 °C (**Fig. 7C-D**).  
309 Some pathways were exclusively differentially expressed at 28 °C, including DNA replication,  
310 spliceosome, base excision repair, nucleotide excision repair, ABC transporters, Hedgehog  
311 pathway, TGF-beta signalling pathway, dorso-ventral axis formation and phototransduction-  
312 fly (**Fig. 7B- C**). At 7 dpi, the majority of pathways detected were upregulated (9/10, 10/13  
313 and 9/12 at 18 °C, 28 °C and 32 °C, respectively; **Fig. 7**). Upregulation of phagosome and  
314 downregulation of endocytosis (aag04144) were exclusively found at 18 °C whilst upregulation  
315 of RNA transport and ECM receptor interaction were unique to 28 °C. On the other hand,  
316 upregulation of mRNA surveillance pathway and regulation of autophagy (aag04140), but  
317 downregulation of aminoacyl tRNA biosynthesis and ubiquitin-mediated proteolysis were  
318 distinctly seen at 32 °C. Most mosquito groups, except those held at 32 °C for 3dpi, showed  
319 enrichment of insulin resistance pathway.

320

### 321 **Unmapped genes in gene enrichment analysis and long non-coding RNA (lncRNA)**

322 We found 266 upregulated genes and 80 downregulated genes that could not be mapped with  
323 DAVID bioinformatics cloud map (**Fig. 8; Supplementary Table 7**). Among these, 123  
324 upregulated and 40 downregulated lncRNA genes were found (**Supplementary Table 8**). That  
325 is, on average, nearly 50% of unmapped genes were found to comprise lncRNAs. Overall,  
326 10.32% of all upregulated and 16.06% of all downregulated DEGs were lncRNAs.

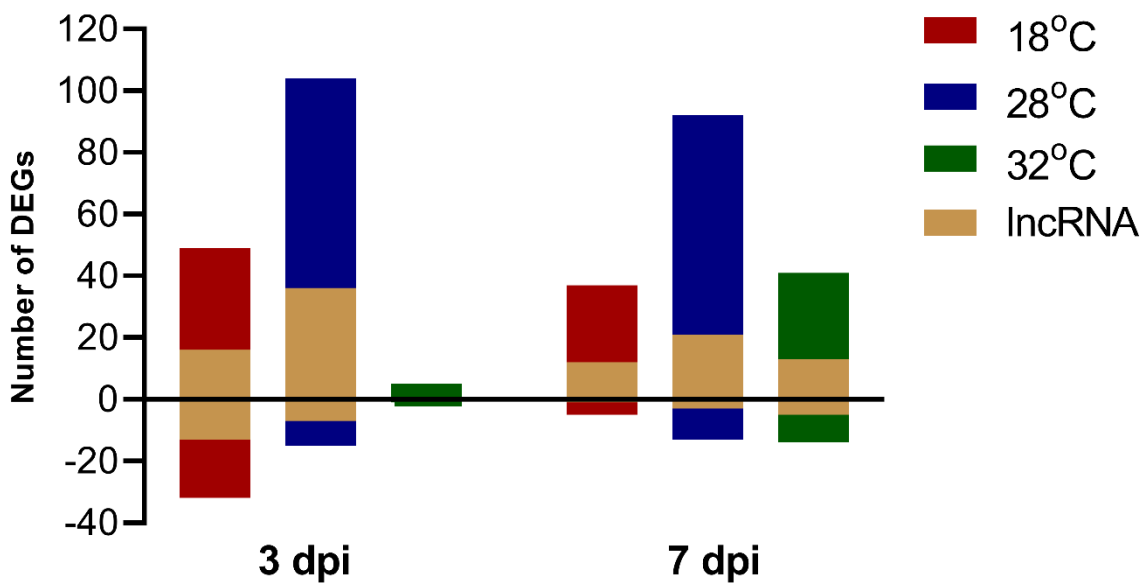

327

328 **Fig 8.** Number of differentially-expressed genes (DEGs) that could not be mapped with DAVID  
329 bioinformatics cloud map. The number of lncRNA genes is shown within the total DEGs.

330

## 331 DISCUSSION

332 Ambient temperature influences the ability of mosquitoes to transmit viruses but the molecular  
333 mechanisms underpinning this are not well understood. Consistent with previous reports,  
334 mosquitoes in our experiment that were held at relatively low ambient temperatures showed  
335 reduced CHIKV replication. Correspondingly, we observed increased replication at 3 dpi at the  
336 highest temperature used here. Distinct mosquito gene expression profiles underpinned  
337 infection response at different ambient temperatures, both in the absolute number of DEGs but  
338 also their gene identities. Similar to our findings for 28 °C, a recent study of mosquitoes held  
339 at 30 °C found a larger number of DEGs expressed at 3 dpi in response to CHIKV [37].  
340 However, exposure to 32 °C in our study elicited a surprisingly low number of genes being  
341 expressed in response to CHIKV compared to control uninfected mosquitoes, particularly at  
342 the earlier time point. This suppressed response is consistent with increased CHIKV replication

343 at this temperature and suggests that, at high temperatures, mosquitoes are unable to mount an  
344 effective defence soon after virus infection.

345 We observed that the repertoire of immune genes differentially expressed in response to  
346 CHIKV infection differed across all temperatures at each time point, contrary to what might  
347 have been expected [38, 39]. The first step in eliciting an immune response is the recognition  
348 of pathogens by pattern recognition receptors [40]. Similar to previous studies [37-39, 41], we  
349 identified diverse PRR genes being differentially expressed in our study, including CLIP-  
350 domain serine protease family B, FREP, LRR, leucine-rich transmembrane proteins, CTLs,  
351 TEP and Galectins. However, we did not find any PRR DEGs common across all temperature  
352 treatments at 3 dpi, while at 7 dpi only *CLIPD6* was shared. There were no immune signalling  
353 or pathogen destruction-related genes found at the higher temperature (32 °C), in contrast to  
354 the mosquitoes held at 28 °C at both time points, which showed extensive upregulation of genes  
355 in both categories. Mosquitoes held at 18 °C and 28 °C showed significant upregulation of  
356 *Dicer-2*, critical in antiviral defence in *Aedes* spp. mosquitoes [42], but there was no differential  
357 expression of this at 32 °C. We observed additional immune genes become expressed at 32 °C  
358 at 7 dpi as compared to 3 dpi, however this involved far fewer genes than at 28 °C and *Dicer-*  
359 *2* was not differentially expressed. A limitation of our study is that we cannot rule out the  
360 presence of increased RNAi (*Dicer-2*) response immediately post infection (i.e. within 24  
361 hours), since our earliest time point was 3 dpi. Taken together, overall, our data suggest that  
362 the immune response to CHIKV is robust at 28 °C, but key components fail to be activated at  
363 higher temperatures.

364 Complementing the strong immune response observed at 28 °C, comprising Toll, IMD and  
365 JAK-STAT pathway components and *Dicer-2* activity, analysis on non-classical components  
366 of immunity revealed the doubling of Cytochrome P450 and serine protease gene numbers  
367 from 3 to 7 dpi in response to CHIKV infection. Cytochromes are generally involved in cellular

368 functions including oxidative stress, respiration, apoptosis and xenobiotic metabolism [43].  
369 The involvement of Cytochrome P450 in midguts of *Ae. aegypti* in response to DENV has been  
370 previously reported [44]. Increases in number of genes coding for serine proteases have also  
371 been reported for *Ae. aegypti* during DENV infection [45], thought to activate immune  
372 pathways through the triggering of serine protease cascades [46]. However, serine proteases  
373 may also aid arbovirus infection through proteolysis of extracellular matrix proteins,  
374 facilitating viral attachment [47]. Despite these strong immune defences at 28 °C, we still  
375 observed an increase in CHIKV replication over time.

376 In our study, the highest number of downregulated genes was found at 18 °C at 3 dpi.  
377 Experiments on *Drosophila* indicate that exposure to non-optimal/ stressful low or high  
378 temperatures causes a significant reduction of lipid storage [48]. At low temperatures, there are  
379 reduced energy reserves owing to the slow accumulation of fat triggered by impaired of  
380 biochemical activities. The lowering of metabolic rates may lead to a slowdown in the  
381 biosynthesis of key host resources necessary to the virus lifecycle, resulting in reduced CHIKV  
382 replication. Consistent with this, we also observed downregulation of genes responsible for  
383 nucleic acid binding, indicating disturbance to gene regulation [49].

384 Mosquitoes have evolved various strategies to cope with different thermal conditions such as  
385 acclimation, adjusting behavioural activity and synthesis of heat shock proteins [50-52]. The  
386 downregulation at 32 °C and 7 dpi of two sensory genes, namely odorant binding protein and  
387 long wavelength opsin, suggest a possible effect on mediators of behavioural activity. Insect  
388 long wavelength opsins have previously been implicated in insect thermoregulatory responses  
389 [53]. Production of HSP proteins such as HSP70 and small HSPs [54] can result in more robust  
390 activation of insect defence mechanisms, and insect cells against mechanical and chemical  
391 stresses caused by damage to host tissue by invading pathogens [55]. Accordingly, we found  
392 significantly upregulated *hsp70* gene expression in response to CHIKV infection across all

393 temperatures in our study. Acclimation to cold temperatures also leads to elevation in HSP  
394 production [56]. Consistent with this, we found that the highest number of *hsp70* genes  
395 expressed at 18 °C, particularly at 3 dpi. It is worth noting that a member (*l2efl*) of the small  
396 heat shock protein *hsp20* family, which has been suggested to suppress virus entry and/ interact  
397 with viral proteins [57], was in the top 10 upregulated genes across all temperatures and time  
398 points in our study. This is the first time, to our knowledge, that *hsp20* involvement has been  
399 identified in *Ae. aegypti* in response to CHIKV infection and may be specific to this interaction,  
400 as it has not been reportedly widely during arbovirus infection of mosquitoes.

401 We provide an updated list of genes involved in immune response, based on the most recent  
402 genome annotation of *Ae. aegypti*. Previous studies of transcriptomic changes may be  
403 hampered by limited annotation and minimal literature on how immune genes/gene  
404 nomenclatures have changed from the *Ae. aegypti* reference genome [58] assembly version  
405 AaegL1 released in 2007 [59] to the AaegL5.2 [60, 61] version published in 2019. A limitation  
406 of our experiment is that we cannot rule out the influence of blood meal digestion in DEG  
407 patterns observed at 3 dpi. Although digestion may be completed by 3 dpi at the higher  
408 temperatures, at 18 °C it may take longer than three days due to a slowdown in metabolism.  
409 Consistent with this, we observed significant downregulation of a zinc carboxypeptidase  
410 (AAEL008609) involved in blood meal digestion [62].

411 Overall, our data suggest that temperature strongly influences the ability of mosquitoes to  
412 transmit viruses and the immune response during infection. At lower temperatures,  
413 downregulation of genes and conservation of resources may drive the viral replication observed  
414 despite the activation of many classical and non-classical immune components. In contrast, at  
415 high temperatures, the impairment of immune responses may result in shorter virus extrinsic  
416 incubation periods and higher virus titers. Impaired mosquito defences may result in a greater  
417 propensity for viruses to emerge in a warming climate. Conversely, impairment may also

418 impose additional strong selection pressure on mosquitoes at high temperatures, resulting in  
419 altered behaviour and geographic ranges.

420 A final important observation is that time matters when dissecting response to infection, as  
421 varying repertoires of genes may be expressed at different points. Our data challenge the  
422 assumption that immune response to infection is constant through time in persistently infected  
423 mosquitoes. There was a 10-fold decrease from 3 dpi to 7 dpi in the number of downregulated  
424 genes in the number of DEGs observed at 18 °C. Conversely, a 6.5-fold increase in the number  
425 of upregulated DEGs was observed at 32 °C. The number of DEGs at 28 °C remained more or  
426 less constant across time points but different repertoires of genes were expressed. In parallel,  
427 gene ontologies identified, and pathways enriched at these temperatures also differed.

428 In conclusion, we show that ambient temperature influences overall gene expression in  
429 response to CHIKV infection and suggest that high temperatures may impair mosquito immune  
430 response. Impaired mosquito responses may accelerate transmission of arboviruses and,  
431 potentially, pathogen emergence. The presence of a considerable number of lncRNA,  
432 pseudogenes and uncharacterised genes significantly differentially expressed in infected  
433 mosquitoes highlights the need for further functional studies and annotation of *Ae. aegypti*  
434 genome.

435

## 436 **METHODS**

### 437 **Mosquitoes and virus infection**

438 Five to 7-day old *Ae. aegypti* were orally challenged with virus-infected or sheep blood alone  
439 (control), using methods previously described [26]. A CHIKV strain from the Asian Genotype  
440 (GenBank ID: MF773560) was prepared as described in [26] and delivered in oral feeds at a  
441 final pfu of  $1 \times 10^7$  per ml of virus stock. Post oral challenge, mosquitoes observed to have

442 taken a blood meal were randomly allocated to three different temperatures (18 °C, 28 °C and  
443 32 °C) in environmental chambers, with 70% humidity at a 12h:12h day/ night cycle.  
444 Mosquitoes were then sampled at 3 and 7 post-infection. Mosquitoes were tested for the  
445 presence of CHIKV in whole bodies (minus wings and legs) using qRT-PCR as previously  
446 described [26].

#### 447 **RNA extraction and NGS sequencing**

448 RNA was extracted from individual mosquito bodies using TRIzol™ reagent (Invitrogen™,  
449 Thermo Fisher Scientific, USA). Samples were homogenised for 90 seconds with the addition  
450 of silica glass beads (Daintree Scientific, St Helens, TAS, Australia) in a MiniBeadbeater-96  
451 (Biospec Products, Bartlesville, Oklahoma, USA). Total RNA was extracted from the  
452 homogenate according to the Trizol protocol. RNA was dissolved in Ultrapure™ water  
453 (Invitrogen™, Thermo Fisher Scientific, USA) to make a final volume of 40 µL, and frozen at  
454 -80 °C until further analysis.

#### 455 **Sample selection and RNAseq**

456 Six mosquito bodies in which we detected the presence of CHIKV were selected from each  
457 time point, for each temperature. The samples were checked for RNA quality >1.8 of A260/280  
458 ratio and quantity by NanoDrop Lite (Thermo Fisher Scientific Inc.). RNA integrity was  
459 checked using RIN score analysis performed in an Agilent 2100 Bioanalyzer (Agilent  
460 Technologies, Palo Alto, CA, USA). Similarly, RNA extracted from uninfected control  
461 mosquitoes was subjected to quality and quantity checking. A total of 72 RNA samples,  
462 comprising 36 infected blood-fed and 36 uninfected blood-fed controls were subjected to  
463 RNAseq, with six per each combination of time point (3 dpi and 7 dpi), and temperature (18  
464 °C, 28 °C and 32 °C). Samples were sequenced on the Illumina HiSeq platform at Genewiz,  
465 China. Illumina raw data generated for all samples were deposited at the Short Read Archive  
466 (SRA) database under the BioProject accession number PRJNA630779.



## 467 **RNAseq data analysis**

468 Sequencing data obtained from Genewiz, China were subjected to quality control and mapping.  
469 Raw sequences in fastq format were subjected to adapter removal and quality trimming using  
470 Trim Galore (<https://github.com/FelixKrueger/TrimGalore>). Poor quality bases/reads with a  
471 quality score lower than 30 and sequences with a read length shorter than 50 nucleotides were  
472 removed to obtain high-quality clean data. To map the sequences, we first downloaded the  
473 reference genome sequences and annotations of AegL5.2 from VectorBase (AegL5) [38],  
474 the most recent annotation release of *Ae. aegypti* [51] genome. Second, RNA STAR two-pass  
475 mapping approach was used to align clean reads onto the AegL5 reference genome sequence  
476 and obtain gene read counts [41]. The RSEM tool was then used to quantify the expression of  
477 gene isoforms [63].

478

## 479 **DEG identification, GO mapping and KEGG pathway analysis**

480 Differential expression analysis was performed using the DESeq2 Bioconductor package [64].  
481 The comparison between the mapped read counts of the virus-infected mosquitoes vs the read  
482 counts of uninfected blood-fed mosquitoes identified differentially expressed genes (DEGs).  
483 Genes were significantly differentially expressed if the adjusted p-value (false discovery rate)  
484 was  $<0.05$  and showed an absolute fold change of  $\pm 1.5$ . For all DEGs, gene annotation was  
485 done using the Biomart tool provided by the VectorBase database. DEG lists were further used  
486 for GO, pathway enrichment and immune response analysis. DAVID bioinformatics (V6.8)  
487 was used to assign GO terms and KEGG pathways information to differentially expressed  
488 genes [65]. WEGO 2.0 was then used to compare and plot GO annotation results at user-  
489 specified hierarchical level 2 [65]. The KEGG pathways enriched by DAVID bioinformatics  
490 were manually categorized under six main categories and subcategories as defined by the  
491 KEGG pathway database [36]. There were some pathways/GO terms with the presence of both

492 up and downregulated genes. This is expected when pathways encode both positive and  
493 negative regulators [66]. Thus, if the upregulated gene group contains "positive" regulators and  
494 downregulated one includes "negative" regulators, in general, the pathway can be considered  
495 as regulated [67]. We used this approach in our descriptions of GO analysis and KEGG  
496 pathway analysis. For gene IDs for which functional information could not be assigned via  
497 DAVID bioinformatics (v6.8) gene enrichment analysis tool, then such genes were subjected  
498 to annotation using VectorBase search and BLAST sequence similarity  
499 (<https://blast.ncbi.nlm.nih.gov/Blast.cgi>).

### 500 **Identification of classical and non-classical immune genes**

501 We downloaded the peptide sequences of all the immune genes listed at the database  
502 ImmunoDB (<http://cegg.unige.ch/Insecta/immunodb>), which possesses information on insect  
503 immune-related genes and gene families [39]. We performed a similarity search using blastp  
504 with the peptides given in VectorBase (<https://www.vectorbase.org/>) under the annotation  
505 release AaegL5. Using an in-house script, we obtained the 10 best hits for each peptide and  
506 then selected the top hit with the largest bit score, % identity and lowest E-value. Next, we  
507 further searched the literature for articles using the search terms "*Aedes aegypti*" and "immune"  
508 published after 2007 to ensure that we identify novel gene families/ genes, that is, the genes  
509 recently discovered to link with immune response and thereby not covered in 2007 annotation  
510 of *Ae. aegypti*. In addition, a manual search for immune-related gene families/ genes identified  
511 VectorBase annotated genes using previously identified gene family names. Genes that were  
512 related to four main categories of immune response process were considered classical immune  
513 genes while the genes directly or indirectly supplementing the above four processes are  
514 regarded as non-classical immune genes. The list of DEGs were compared against the list of  
515 immune genes identified through both literature review and similarity screening using Venny  
516 2.1. Additionally, a list of lncRNA was identified comparing conserved ID sets between

517 AaegL3.1 and AaegL5.1 gene annotation, and by including lncRNAs reported in AaegL5.2  
518 [63].

### 519 **CHIKV read count analysis**

520 Estimation of chikungunya virus replication in infected and control *Ae. aegypti* was also  
521 performed by mapping high-quality adaptor-clipped Illumina pair-end reads onto the  
522 chikungunya virus genome, Asian genotype (GenBank accession no. MF773560) using  
523 Burrows-Wheeler Aligner (BWA) mem (<https://arxiv.org/abs/1303.3997>). Read counts of  
524 aligned reads were obtained using samtools idxstats [68]. Normalised Reads Per Million (RPM)  
525 counts were calculated to quantify viral read counts. Two samples (RY-74 and RY-75) were  
526 identified as outliers on the correlation plot between virus titer and normalized reads per million  
527 counts and were removed from further analysis. The Mann-Whitney test was used to find  
528 differences between virus read counts of any two mosquito groups. The Kruskal-Wallis test  
529 was used for comparison of viral reads of multiple groups. A p-value <0.05 was considered  
530 statistically significant. Statistical analyses were performed using SPSS 25 (IBM Statistics).  
531 Graphs were prepared using GraphPad Prism version 8.3.0.

532

### 533 **ACKNOWLEDGEMENTS**

534 We thank Mr Henry Simila for technical assistance. The research presented here was funded  
535 by the National Health and Medical Research Council (NHMRC) of Australia project grant  
536 APP1125317 and the Royal Society of Tropical Medicine and Hygiene small grants program.  
537 BMC Randika Wimalasiri-Yapa was funded by the University Grants Commission Sri Lanka,  
538 The Open University of Sri Lanka and Queensland University of Technology, Brisbane,  
539 Australia.

540

541 **REFERENCES**

- 542 1. World Health Organization. A global brief on vector-borne diseases. Geneva,  
543 Switzerland: World Health Organization, 2014 Contract No.: WHO/DCO/WHD/2014.1.
- 544 2. Forshey BM, Guevara C, Laguna-Torres VA, Cespedes M, Vargas J, Gianella A, et al.  
545 Arboviral etiologies of acute febrile illnesses in Western South America, 2000-2007.  
546 PLoS Negl Trop Dis. 2010;4(8):e787. Epub 2010/08/14. doi:  
547 10.1371/journal.pntd.0000787. PubMed PMID: 20706628; PubMed Central PMCID:  
548 PMCPMC2919378.
- 549 3. Caminade C, McIntyre KM, Jones AE. Impact of recent and future climate change on  
550 vector-borne diseases. Ann N Y Acad Sci. 2019;1436(1):157-73. Epub 2018/08/18. doi:  
551 10.1111/nyas.13950. PubMed PMID: 30120891.
- 552 4. Gross TL, Myles KM, Adelman ZN. Identification and characterization of heat shock 70  
553 genes in *Aedes aegypti* (Diptera: Culicidae). J Med Entomol. 2009;46(3):496-504. doi:  
554 10.1603/033.046.0313. PubMed PMID: 19496419.
- 555 5. Kraemer MUG, Reiner RC, Brady OJ, Messina JP, Gilbert M, Pigott DM, et al. Past and  
556 future spread of the arbovirus vectors *Aedes aegypti* and *Aedes albopictus*. Nat  
557 Microbiol. 2019;4(5):854-63. doi: 10.1038/s41564-019-0376-y.
- 558 6. Iwamura T, Guzman-Holst A, Murray KA. Accelerating invasion potential of disease  
559 vector *Aedes aegypti* under climate change. Nat Commun. 2020;11(1):2130. doi:  
560 10.1038/s41467-020-16010-4.
- 561 7. Xu Z, Bambrick H, Frentiu FD, Devine GJ, Yakob L, Williams G, et al. Projecting the  
562 future of dengue under climate change scenarios: Progress, uncertainties and research  
563 needs. PLoS Negl Trop Dis. 2020;14(3):e0008118. doi: 10.1371/journal.pntd.0008118.
- 564 8. Huang X, Hu W, Yakob L, Devine GJ, McGraw EA, Jansen CC, et al. El Niño Southern  
565 oscillation, overseas arrivals and imported chikungunya cases in Australia: A time series  
566 analysis. PLoS Negl Trop Dis. 2019;13(5):e0007376. doi: 10.1371/journal.pntd.0007376.
- 567 9. Messina JP, Brady OJ, Golding N, Kraemer MUG, Wint GRW, Ray SE, et al. The  
568 current and future global distribution and population at risk of dengue. Nat Microbiol.  
569 2019;4(9):1508-15. doi: 10.1038/s41564-019-0476-8.
- 570 10. Kleino A. The Imd pathway-mediated immune response in *Drosophila*: Tampere  
571 University Press; 2010.
- 572 11. Sluss HK, Han Z, Barrett T, Goberdhan DC, Wilson C, Davis RJ, et al. A JNK signal  
573 transduction pathway that mediates morphogenesis and an immune response in  
574 *Drosophila*. Gene Dev. 1996;10(21):2745-58. Epub 1996/11/01. doi:  
575 10.1101/gad.10.21.2745. PubMed PMID: 8946915.
- 576 12. Ciota AT, Keyel AC. The role of temperature in transmission of zoonotic arboviruses.  
577 Viruses. 2019;11(11):1013. doi: 10.3390/v11111013. PubMed PMID: 31683823.
- 578 13. Wimalasiri-Yapa BMCR, Stassen L, Hu W, Yakob L, McGraw AE, Pyke TA, et al.  
579 Chikungunya virus transmission at low temperature by *Aedes albopictus* mosquitoes.  
580 Pathogens. 2019;8(3). doi: 10.3390/pathogens8030149.
- 581 14. McFarlane M, Arias-Goeta C, Martin E, O'Hara Z, Lulla A, Mousson L, et al.  
582 Characterization of *Aedes aegypti* innate-immune pathways that limit Chikungunya virus  
583 replication. PLoS Negl Trop Dis. 2014;8(7):e2994. doi: 10.1371/journal.pntd.0002994.
- 584 15. Meister M, Lemaitre B, Hoffmann JA. Antimicrobial peptide defense in *Drosophila*.  
585 BioEssays. 1997;19(11):1019-26. doi: 10.1002/bies.950191112.
- 586 16. Gao Y, Fallon AM. Immune activation upregulates lysozyme gene expression in *Aedes*  
587 *aegypti* mosquito cell culture. Insect Mol Biol. 2000;9(6):553-8. Epub 2000/12/21. doi:  
588 10.1046/j.1365-2583.2000.00216.x. PubMed PMID: 11122464.

- 589 17. Bryant B, Blair CD, Olson KE, Clem RJ. Annotation and expression profiling of  
590 apoptosis-related genes in the yellow fever mosquito, *Aedes aegypti*. *Insect Biochem*  
591 *Mol Biol.* 2008;38(3):331-45. Epub 2007/12/07. doi: 10.1016/j.ibmb.2007.11.012.  
592 PubMed PMID: 18252247.
- 593 18. Furuya-Kanamori L, Liang S, Milinovich G, Soares Magalhaes RJ, Clements ACA, Hu  
594 W, et al. Co-distribution and co-infection of chikungunya and dengue viruses. *BMC*  
595 *Infect Dis.* 2016;16(1):84. doi: 10.1186/s12879-016-1417-2.
- 596 19. Wimalasiri-Yapa BMCR, Stassen L, Huang X, Hafner LM, Hu W, Devine GJ, et al.  
597 Chikungunya virus in Asia-Pacific: a systematic review. *Emerg Microb Infect.*  
598 2019;8(1):70-9. doi: 10.1080/22221751.2018.1559708. PubMed PMID: 30866761.
- 599 20. Suhrbier A. Rheumatic manifestations of chikungunya: emerging concepts and  
600 interventions. *Nat Rev Rheumatol* 2019;15(10):597-611.
- 601 21. Treweek TM, Meehan S, Ecroyd H, Carver JA. Small heat-shock proteins: important  
602 players in regulating cellular proteostasis. *Cell Mol Life Sci.* 2015;72(3):429-51. doi:  
603 10.1007/s00018-014-1754-5.
- 604 22. Lumsden WHR. An epidemic of virus disease in southern province, Tanganyika  
605 territory, in 1952-53. I. Clinical features. *Trans R Soc Trop Med Hyg* 1955;49(1):28.
- 606 23. Tsetsarkin KA, Vanlandingham DL, McGee CE, Higgs S. A single mutation in  
607 chikungunya virus affects vector specificity and epidemic potential. *PLoS Pathog.*  
608 2007;3(12).
- 609 24. Staples JE, Hills SL, Powers AM. Chikungunya. *CDC's Yellow Book (Health*  
610 *Information for International Travel) Centers for Disease Control and Prevention; 2020.*
- 611 25. World Health Organisation. Dengue and severe dengue 2020 [cited 2020 19.04.2020].  
612 Available from: [https://www.who.int/news-room/fact-sheets/detail/dengue-and-severe-](https://www.who.int/news-room/fact-sheets/detail/dengue-and-severe-dengue)  
613 [dengue](https://www.who.int/news-room/fact-sheets/detail/dengue-and-severe-dengue).
- 614 26. Wimalasiri-Yapa BMCR, Stassen L, Hu W, Yakob L, McGraw EA, Pyke AT, et al.  
615 Chikungunya virus transmission at low temperature by *Aedes albopictus* mosquitoes.  
616 *Pathogens.* 2019;8(3). Epub 2019/09/25. doi: 10.3390/pathogens8030149. PubMed  
617 PMID: 31547257; PubMed Central PMCID: PMC6789888.
- 618 27. Mathur K, Anand A, Dubey SK, Sanan-Mishra N, Bhatnagar RK, Sunil S. Analysis of  
619 chikungunya virus proteins reveals that non-structural proteins nsP2 and nsP3 exhibit  
620 RNA interference (RNAi) suppressor activity. *Sci Rep.* 2016;6:38065-. doi:  
621 10.1038/srep38065. PubMed PMID: 27901124.
- 622 28. Bonizzoni M, Dunn WA, Campbell CL, Olson KE, Dimon MT, Marinotti O, et al. RNA-  
623 seq analyses of blood-induced changes in gene expression in the mosquito vector  
624 species, *Aedes aegypti*. *BMC Genomics.* 2011;12(1):82. doi: 10.1186/1471-2164-12-82.
- 625 29. Matthews BJ, Dudchenko O, Kingan SB, Koren S, Antoshechkin I, Crawford JE, et al.  
626 Improved reference genome of *Aedes aegypti* informs arbovirus vector control. *Nature.*  
627 2018;563(7732):501-7. doi: 10.1038/s41586-018-0692-z.
- 628 30. Wang J, Song X, Wang M. Peptidoglycan recognition proteins in hematophagous  
629 arthropods. *Dev Comp Immunol.* 2018;83:89-95. Epub 2017/12/23. doi:  
630 10.1016/j.dci.2017.12.017. PubMed PMID: 29269264; PubMed Central PMCID:  
631 PMC65889321.
- 632 31. Adelman ZN, Myles KM. The C-Type Lectin domain gene family in *Aedes aegypti* and  
633 their role in arbovirus infection. *Viruses.* 2018;10(7). Epub 2018/07/14. doi:  
634 10.3390/v10070367. PubMed PMID: 30002303; PubMed Central PMCID:  
635 PMC6070988.
- 636 32. Xiao X, Liu Y, Zhang X, Wang J, Li Z, Pang X, et al. Complement-related proteins  
637 control the flavivirus infection of *Aedes aegypti* by inducing antimicrobial peptides.  
638 *PLoS Pathog.* 2014;10(4):e1004027. doi: 10.1371/journal.ppat.1004027.

- 639 33. Lawson D, Arensburger P, Atkinson P, Besansky NJ, Bruggner RV, Butler R, et al.  
640 VectorBase: a data resource for invertebrate vector genomics. *Nucleic Acids Res.*  
641 2008;37(suppl\_1):D583-D7. doi: 10.1093/nar/gkn857.
- 642 34. Wang YH, Chang MM, Wang XL, Zheng AH, Zou Z. The immune strategies of  
643 mosquito *Aedes aegypti* against microbial infection. *Dev Comp Immunol.* 2018;83:12-  
644 21. Epub 2017/12/09. doi: 10.1016/j.dci.2017.12.001. PubMed PMID: 29217264.
- 645 35. Lee W-S, Webster JA, Madzokere ET, Stephenson EB, Herrero LJ. Mosquito antiviral  
646 defense mechanisms: a delicate balance between innate immunity and persistent viral  
647 infection. *Parasit Vectors.* 2019;12(1):165-. doi: 10.1186/s13071-019-3433-8. PubMed  
648 PMID: 30975197.
- 649 36. Sigle LT, McGraw EA. Expanding the canon: Non-classical mosquito genes at the  
650 interface of arboviral infection. *Insect Biochem Mol Biol.* 2019;109:72-80. doi:  
651 <https://doi.org/10.1016/j.ibmb.2019.04.004>.
- 652 37. Zhao L, Alto BW, Jiang Y, Yu F, Zhang Y. Transcriptomic analysis of *Aedes aegypti*  
653 innate immune system in response to ingestion of chikungunya virus. *Int J Mol Sci.*  
654 2019;20(13):3133. doi: 10.3390/ijms20133133. PubMed PMID: 31252518.
- 655 38. Etebari K, Hegde S, Saldaña MA, Widen SG, Wood TG, Asgari S, et al. Global  
656 transcriptome analysis of *Aedes aegypti* mosquitoes in response to zika virus infection.  
657 *mSphere.* 2017;2(6):e00456-17. doi: 10.1128/mSphere.00456-17. PubMed PMID:  
658 29202041.
- 659 39. Colpitts TM, Cox J, Vanlandingham DL, Feitosa FM, Cheng G, Kurscheid S, et al.  
660 Alterations in the *Aedes aegypti* transcriptome during infection with west Nile, dengue  
661 and yellow fever viruses. *PLoS Pathog.* 2011;7(9):e1002189. doi:  
662 10.1371/journal.ppat.1002189.
- 663 40. Kingsolver MB, Huang Z, Hardy RW. Insect antiviral innate immunity: pathways,  
664 effectors, and connections. *J Mol Biol.* 2013;425(24):4921-36. Epub 2013/10/15. doi:  
665 10.1016/j.jmb.2013.10.006. PubMed PMID: 24120681; PubMed Central PMCID:  
666 PMC4007215.
- 667 41. Dong S, Behura SK, Franz AWE. The midgut transcriptome of *Aedes aegypti* fed with  
668 saline or protein meals containing chikungunya virus reveals genes potentially involved  
669 in viral midgut escape. *BMC Genomics.* 2017;18(1):382. Epub 2017/05/17. doi:  
670 10.1186/s12864-017-3775-6. PubMed PMID: 28506207; PubMed Central PMCID:  
671 PMC45433025.
- 672 42. Sabin LR, Zheng Q, Thekkat P, Yang J, Hannon GJ, Gregory BD, et al. Dicer-2  
673 processes diverse viral RNA species. *PLoS One.* 2013;8(2):e55458. doi:  
674 10.1371/journal.pone.0055458.
- 675 43. Scott JG, Kasai S. Evolutionary plasticity of monooxygenase-mediated resistance. *Pestic*  
676 *Biochem Phys.* 2004;78(3):171-8. doi: <https://doi.org/10.1016/j.pestbp.2004.01.002>.
- 677 44. Barón OL, Ursic-Bedoya RJ, Lowenberger CA, Ocampo CB. Differential gene  
678 expression from midguts of refractory and susceptible lines of the mosquito, *Aedes*  
679 *aegypti*, infected with dengue-2 virus. *J Insect Sci.* 2010;10(1). doi:  
680 10.1673/031.010.4101.
- 681 45. Sim S, Ramirez JL, Dimopoulos G. Dengue virus infection of the *Aedes aegypti* salivary  
682 gland and chemosensory apparatus induces genes that modulate infection and blood-  
683 feeding behavior. *PLoS Pathog.* 2012;8(3):e1002631. Epub 2012/04/06. doi:  
684 10.1371/journal.ppat.1002631. PubMed PMID: 22479185; PubMed Central PMCID:  
685 PMC3315490.
- 686 46. Ribeiro JM, Arca B, Lombardo F, Calvo E, Phan VM, Chandra PK, et al. An annotated  
687 catalogue of salivary gland transcripts in the adult female mosquito, *Aedes aegypti*. *BMC*

- 688 Genomics. 2007;8:6. Epub 2007/01/06. doi: 10.1186/1471-2164-8-6. PubMed PMID:  
689 17204158; PubMed Central PMCID: PMC1790711.
- 690 47. Conway MJ, Watson AM, Colpitts TM, Dragovic SM, Li Z, Wang P, et al. Mosquito  
691 saliva serine protease enhances dissemination of dengue virus into the mammalian host. *J*  
692 *Virol.* 2014;88(1):164-75. doi: 10.1128/jvi.02235-13.
- 693 48. Klepsatel P, Wildridge D, Gálíková M. Temperature induces changes in *Drosophila*  
694 energy stores. *Sci Rep.* 2019;9(1):5239. doi: 10.1038/s41598-019-41754-5.
- 695 49. Laity JH, Lee BM, Wright PE. Zinc finger proteins: new insights into structural and  
696 functional diversity. *Curr Opin Struct Biol* 2001;11(1):39-46. doi:  
697 [https://doi.org/10.1016/S0959-440X\(00\)00167-6](https://doi.org/10.1016/S0959-440X(00)00167-6).
- 698 50. Angleró-Rodríguez YI, MacLeod HJ, Kang S, Carlson JS, Jupatanakul N, Dimopoulos  
699 G. *Aedes aegypti* molecular responses to zika virus: Modulation of infection by the Toll  
700 and JAK/STAT immune pathways and virus host factors. *Front Microbiol.* 2017;8(2050).  
701 doi: 10.3389/fmicb.2017.02050.
- 702 51. Costa A, Jan E, Sarnow P, Schneider D. The Imd pathway is involved in antiviral  
703 immune responses in *Drosophila*. *PLoS One.* 2009;4(10):e7436. doi:  
704 10.1371/journal.pone.0007436.
- 705 52. Garver LS, Bahia AC, Das S, Souza-Neto JA, Shiao J, Dong Y, et al. Anopheles Imd  
706 pathway factors and effectors in infection intensity-dependent anti-Plasmodium action.  
707 *PLoS Pathog.* 2012;8(6):e1002737-e. Epub 2012/06/07. doi:  
708 10.1371/journal.ppat.1002737. PubMed PMID: 22685401.
- 709 53. Frentiu FD, Yuan F, Savage WK, Bernard GD, Mullen SP, Briscoe AD. Opsin clines in  
710 butterflies suggest novel roles for insect photopigments. *Mol Biol Evol.* 2015;32(2):368-  
711 79. Epub 2014/11/06. doi: 10.1093/molbev/msu304. PubMed PMID: 25371434.
- 712 54. Mogk A, Bukau B, E. D. Cell functions of cytosolic *E. coli* chaperones. *Molecular*  
713 *Chaperones in the Cell.* 2001.
- 714 55. Wojda I. Temperature stress and insect immunity. *J Therm Biol.* 2017;68:96-103. doi:  
715 <https://doi.org/10.1016/j.jtherbio.2016.12.002>.
- 716 56. Teigen LE, Orczewska JI, McLaughlin J, O'Brien KM. Cold acclimation increases levels  
717 of some heat shock protein and sirtuin isoforms in threespine stickleback. *Comp*  
718 *Biochem Physiol A Mol Integr Physiol.* 2015;188:139-47. Epub 2015/07/01. doi:  
719 10.1016/j.cbpa.2015.06.028. PubMed PMID: 26123780.
- 720 57. Li J, Xiang C-Y, Yang J, Chen J-P, Zhang H-M. Interaction of HSP20 with a viral RdRp  
721 changes its sub-cellular localization and distribution pattern in plants. *Sci Rep.*  
722 2015;5:14016-. doi: 10.1038/srep14016. PubMed PMID: 26359114.
- 723 58. Ribeiro FS, da Silva ICdA, Carneiro VC, Belgrano FdS, Mohana-Borges R, de Andrade  
724 IR, et al. The dengue vector *Aedes aegypti* contains a functional high mobility group box  
725 1 (hmg1) protein with a unique regulatory c-terminus. *PLoS One.* 2012;7(7):e40192.  
726 doi: 10.1371/journal.pone.0040192.
- 727 59. Celona B, Weiner A, Felice FD, Mancuso FM, Cesarini E, Rossi RL, et al. Substantial  
728 Histone reduction modulates genomewide nucleosomal occupancy and global  
729 transcriptional output. *PLoS Biol.* 2011;9(6):e1001086. doi:  
730 10.1371/journal.pbio.1001086.
- 731 60. Behura SK, Gomez-Machorro C, Harker BW, deBruyn B, Lovin DD, Hemme RR, et al.  
732 Global cross-talk of genes of the mosquito *Aedes aegypti* in response to dengue virus  
733 infection. *PLoS Negl Trop Dis* 2011;5(11):e1385. doi: 10.1371/journal.pntd.0001385.
- 734 61. Liu Q, Clem RJ. Defining the core apoptosis pathway in the mosquito disease vector  
735 *Aedes aegypti*: the roles of *iap1*, *ark*, *dronc*, and effector caspases. *Apoptosis.*  
736 2011;16(2):105-13. doi: 10.1007/s10495-010-0558-9. PubMed PMID: 21107703.

- 737 62. Isoe J, Zamora J, Miesfeld RL. Molecular analysis of the *Aedes aegypti*  
738 carboxypeptidase gene family. *Insect Biochem Mol Biol.* 2009;39(1):68-73. Epub  
739 2008/10/14. doi: 10.1016/j.ibmb.2008.09.006. PubMed PMID: 18977440.
- 740 63. Shrinet J, Srivastava P, Sunil S. Transcriptome analysis of *Aedes aegypti* in response to  
741 mono-infections and co-infections of dengue virus-2 and chikungunya virus. *Biochem*  
742 *Biophys Res Commun.* 2017;492(4):617-23. Epub 2017/02/06. doi:  
743 10.1016/j.bbrc.2017.01.162. PubMed PMID: 28161634.
- 744 64. Sanchez EL, Lagunoff M. Viral activation of cellular metabolism. *Virology.* 2015;479-  
745 480:609-18. Epub 2015/03/31. doi: 10.1016/j.virol.2015.02.038. PubMed PMID:  
746 25812764; PubMed Central PMCID: PMC4424078.
- 747 65. Chotiwan N, Andre BG, Sanchez-Vargas I, Islam MN, Grabowski JM, Hopf-Jannasch A,  
748 et al. Dynamic remodeling of lipids coincides with dengue virus replication in the midgut  
749 of *Aedes aegypti* mosquitoes. *PLoS pathog.* 2018;14(2):e1006853-e. doi:  
750 10.1371/journal.ppat.1006853. PubMed PMID: 29447265.
- 751 66. Bonizzoni M, Dunn WA, Campbell CL, Olson KE, Marinotti O, James AA. Complex  
752 modulation of the *Aedes aegypti* transcriptome in response to dengue virus infection.  
753 *PLoS One.* 2012;7(11):e50512. doi: 10.1371/journal.pone.0050512. PubMed PMID:  
754 23209765; PubMed Central PMCID: PMC3507784.
- 755 67. Brackney DE, Foy BD, Olson KE. The effects of midgut serine proteases on dengue  
756 virus type 2 infectivity of *Aedes aegypti*. *Am J Trop Med Hyg.* 2008;79(2):267-74.  
757 PubMed PMID: 18689635.
- 758 68. Li H, Handsaker B, Wysoker A, Fennell T, Ruan J, Homer N, et al. The sequence  
759 alignment/map format and SAMtools. *Bioinformatics.* 2009;25(16):2078-9. Epub  
760 2009/06/10. doi: 10.1093/bioinformatics/btp352. PubMed PMID: 19505943; PubMed  
761 Central PMCID: PMC2723002.
